1 **Alzheimer's genetic risk factor *FERMT2* (Kindlin-2) controls axonal**  
2 **growth and synaptic plasticity in an APP-dependent manner**

3 Fanny Eysert<sup>1</sup>, Audrey Coulon<sup>1</sup>, Emmanuelle Boscher<sup>2,3</sup>, Anaïs-Camille Vreulx<sup>1</sup>, Amandine Flaig<sup>1</sup>,  
4 Tiago Mendes<sup>1</sup>, Sandrine Hughes<sup>4</sup>, Benjamin Grenier-Boley<sup>1</sup>, Xavier Hanouille<sup>5</sup>, Florie Demiautte<sup>1</sup>,  
5 Charlotte Bauer<sup>6</sup>, Mikael Marttinen<sup>7</sup>, Mari Takalo<sup>7</sup>, Philippe Amouyel<sup>1</sup>, Shruti Desai<sup>1</sup>, Ian Pike<sup>8</sup>,  
6 Mikko Hiltunen<sup>7</sup>, Frédéric Chécler<sup>6</sup>, Mélissa Farinelli<sup>4</sup>, Charlotte Delay<sup>1</sup>, Nicolas Malmanche<sup>1</sup>,  
7 Sébastien Hébert<sup>2,3</sup>, Julie Dumont<sup>1</sup>, Devrim Kilinc<sup>1</sup>, Jean-Charles Lambert<sup>1,#</sup> and Julien Chapuis<sup>1,#</sup>

8 # These authors share the last authorship

9

- 10 1. Univ. Lille, Inserm, CHU Lille, Institut Pasteur de Lille, U1167 - RID-AGE - Facteurs de risque et  
11 déterminants moléculaires des maladies liées au vieillissement, Lille 59019 France  
12 2. Centre de recherche du CHU de Québec-Université Laval, CHUL, Axe Neurosciences, Québec, Canada  
13 3. Faculté de médecine, Département de psychiatrie et de neurosciences, Université Laval, Québec, Canada  
14 4. E-PHY-SCIENCE, Bioparc de Sophia Antipolis, 2400 route des Colles, Biot 06410 France  
15 5. Univ. Lille, CNRS, UMR8576 - Labex DISTALZ, Villeneuve d'Ascq 59655 France  
16 6. Université Côte d'Azur, Inserm, CNRS, IPMC, DistAlz Laboratory of Excellence, Valbonne, France  
17 7. Institute of Biomedicine, University of Eastern Finland, Kuopio, Finland  
18 8. Proteome Sciences plc, Hamilton House, London WC1H 9BB, United Kingdom

19

20 **Corresponding author:**

21 Julien Chapuis, PhD

22 Inserm UMR1167, Institut Pasteur de Lille, 1 rue du Pr. Calmette, Lille 59019 France

23 Tel: + 33 3 20 87 78 01

24 Fax: + 33 3 20 87 78 94

25 E-mail: [julien.chapuis@pasteur-lille.fr](mailto:julien.chapuis@pasteur-lille.fr)

26

27 **ABSTRACT**

28 Although APP metabolism is being intensively investigated, a large fraction of its modulators are yet  
29 to be characterized. In this context, we combined two genome-wide high-content screenings to assess  
30 the functional impact of miRNAs and genes on APP metabolism and the signaling pathways involved.  
31 This approach highlighted the involvement of *FERMT2* (or Kindlin-2), a genetic risk factor of  
32 Alzheimer's disease (AD), as a potential key modulator of axon guidance; a neuronal process that  
33 depends on the regulation of APP metabolism. We found that FERMT2 directly interacts with APP to  
34 modulate its metabolism and that FERMT2 under-expression impacts axonal growth, synaptic  
35 connectivity and long-term potentiation in an APP-dependent manner. Lastly, the rs7143400-T allele,  
36 which is associated with an increased AD risk and localized within the 3'UTR of FERMT2, induced a  
37 down-regulation of FERMT2 expression through binding of miR-4504 among others. This miRNA is  
38 mainly expressed in neurons and significantly overexpressed in AD brains compared to controls.  
39 Altogether, our data provide strong evidence for a detrimental effect of FERMT2 under-expression in  
40 neurons and insight on how this may influence AD pathogenesis.

41

42

43 **INTRODUCTION**

44

45 AD is a neurodegenerative disease characterized by two main pathological hallmarks: (i) intracellular  
46 neurofibrillary tangles consisting of hyper-phosphorylated Tau proteins and (ii) extracellular amyloid  
47 plaques consisting of aggregates of  $\beta$ -amyloid ( $A\beta$ ) peptides resulting from the processing of amyloid  
48 precursor protein (APP). Three main proteases ( $\alpha$ -,  $\beta$ - and  $\gamma$ - secretases) are involved in APP  
49 processing through (i) the amyloidogenic pathway ( $\beta$ - and  $\gamma$ -secretases), leading to  $A\beta$  production, and  
50 (ii) the non-amyloidogenic pathway ( $\alpha$ - and  $\gamma$ -secretases), which prevents  $A\beta$  generation by cleaving  
51 APP within the  $A\beta$  sequence (Checler 1995).

52 The identification of early-onset autosomal dominant AD-linked mutations in the genes for *APP* and  
53 presenilins (*PS1* and *PS2*, part of the  $\gamma$ -secretase), have placed abnormal APP metabolism at the center  
54 of the disease, further supporting the amyloid cascade hypothesis (Hardy 1997; Hardy & Selkoe  
55 2002): the overproduction of  $A\beta$  peptides –especially the longer forms that are thought to be more  
56 neurotoxic– may lead to (or favor) Tau pathology and subsequent neuronal death.

57 Although the validity of the amyloid cascade hypothesis is debated (Morris et al. 2018), the  
58 importance of APP has recently been emphasized by the discovery of a rare *APP* mutation hampering  
59  $A\beta$  production that lowers AD risk (Jonsson et al. 2012). Moreover, loss of functions variant in  
60 *SORL1* (Sortilin-related receptor, L(DLR class A), which is a strong regulator of APP metabolism and  
61  $A\beta$  production, is associated with early- and late-onset forms of AD (Nicolas et al. 2016; Andersen et  
62 al. 2005). Beyond  $A\beta$  production, the involvement of genetic risk factors such as *APOE* and *TERM2*  
63 in modulation of  $A\beta$  aggregation and/or degradation/clearance has been proposed to be essential in the  
64 AD process (Kim et al. 2009; Jay et al. 2017). Recent high-throughput genomic approaches have also  
65 highlighted APP metabolism in the AD pathophysiological process: the main actors of APP  
66 metabolism, *e.g.*, *ADAM10* and *APH1B* (part of the  $\gamma$ -secretase complex), have been characterized as  
67 genetic determinants (Jansen et al. 2019; Kunkle et al. 2019), and numerous other genetic  
68 determinants have been described as potential modulators of APP metabolism (for a review, see  
69 (Dourlen et al. 2019)).

70 Among these genetic determinants, *FERMT2* has been identified to be involved in APP metabolism  
71 using an agnostic, systematic approach, *i.e.*, high content screening of 18,107 siRNA pools in HEK293  
72 cells stably over-expressing an APP fusion protein (mCherry-APP<sup>695WT</sup>-YFP) that allows for the  
73 quantification of intracellular APP fragments (Chapuis et al. 2017). Following this initial screening,  
74 *FERMT2* under-expression was then specifically associated with increasing levels of mature APP at  
75 the cell surface, where *FERMT2* facilitates APP recycling, resulting in increased  $A\beta$  peptide  
76 production (Chapuis et al. 2017).

77 Little is known about *FERMT2*. This protein localizes to focal adhesions, where it is proposed to  
78 interact with  $\beta 3$  integrin and to be a major actor in integrin activation (Theodosiou et al. 2016).  
79 *FERMT2* has been reported as a key protein involved in cardiac and skeletal muscle development

80 (Dowling et al. 2008), and has been involved in cancer progression (Shen et al. 2012; Zhan et al. 2012;  
81 Sossey-Alaoui et al. 2019). However, despite of the fact that FERMT2 is a major genetic risk factor of  
82 AD, the physiological and/or pathophysiological roles of FERMT2 in the brain have not been  
83 identified. Within this background, we sought to determine how FERMT2 regulation impacts APP  
84 metabolism and/or AD risk and could be its involvement in neuronal functions.

85

86 **METHODS**

87

88 **Cell culture**

89 Human HeLa (RRID:CVCL\_0030) and HEK293 (RRID:CVCL\_0045) cells were respectively  
90 maintained in Eagle's minimal essential medium (American Type Culture Collection, Teddington,  
91 UK) and DMEM/Ham's F-12 1:1 medium (Life Technologies, Carlsbad, CA) supplemented with 10%  
92 heat-inactivated fetal bovine serum and 2 mM L-glutamine, penicilline (10 UI/mL)/Streptomycine (10  
93 µg/mL).

94

95 **Microfluidic chip fabrication**

96 Masters of multi-compartment microfluidic devices were fabricated through photolithography as  
97 previously described (Blasiak et al. 2015). Polydimethylsiloxane (PDMS; Sylgard 184; Dow  
98 Corning, Midland, MI) pads were replica molded (2 h at 70°C) and irreversibly bonded to glass  
99 coverslips *via* O<sub>2</sub> plasma (Diener, Ebhausen, Germany). The devices were placed in plastic Petri  
100 dishes, wetted with dH<sub>2</sub>O, and UV sterilized for 30 min.

101

102 **Primary neuronal culture and viral transductions**

103 Primary neuronal cultures were obtained from hippocampus or cortices of post-natal (P0) rats as  
104 described previously (Kaech & Banker 2006). Briefly, after the dissection of the brains, hippocampi  
105 were washed three times in HBSS (HBSS, 1 M HEPES, penicilline/streptomycine, 100 mM sodium  
106 pyruvate; Gibco) and were dissociated *via* trypsin digestion (2.5%, 37°C; Gibco) for 7 min. Next,  
107 hippocampi were incubated with DNase (5 mg/mL; Sigma) for 1 min and washed again in MEM  
108 medium supplemented with 10% SVF, 1% Glutamax, 0.8% MEM vitamins, 0.5%  
109 penicilline/streptomycine and 0.45% D-glucose (Sigma). With a pipette, hippocampi were  
110 mechanically dissociated and resuspended in Neurobasal A medium (Gibco) supplemented with 2%  
111 B27 (Gibco) and 0.25% GlutaMax. 200,000 neurons were seeded per well in 24-well plates. 50,000  
112 neurons were seeded in the somatic chamber of microfluidic devices, pre-coated with poly-L-lysine  
113 (0.1 mg/mL; Sigma) in borate buffer (0.31% boric acid, 0.475% sodium tetraborate, pH = 8.5). 0.1%  
114 EDTA (in H<sub>2</sub>O) was added to the Petri dishes containing microfluidic devices to minimize  
115 evaporation. The culture medium was refreshed every 3 d. Neurons were maintained at 37°C in a  
116 humidified 5% CO<sub>2</sub> incubator.

117

118 **Lentiviral transductions**

119 Lentiviral transductions were carried out at 1 day *in vitro* (DIV1) with a multiplicity of infection  
120 (MOI) of 10. In the case of co-transduction, MOI of 5 was used for each lentivirus. Briefly,  
121 lentiviruses were diluted in culture medium containing 4 µg/mL polybrene (hexadimethrine bromide;  
122 Sigma) and were added to the cells. After 6 h of transduction, lentivirus suspension was replaced with

123 fresh medium. The following lentiviruses were used for transduction: Mission shRNA vectors (Sigma)  
124 shNT (Non-Mammalian shRNA Control, SHC002), shFERMT2 (TRCN0000191859), shAPP  
125 (TRCN000006707) and pLenti6 empty vectors (Mock) or including human FERMT2<sup>WT</sup> or  
126 FERMT2<sup>QW</sup> cDNA sequences. LifeAct-Ruby lentivirus (pLenti.PGK.LifeAct-Ruby.W:  
127 RRID:Addgene\_51009) was a kind gift from Rusty Lansford.

128

### 129 **RFLP genotyping**

130 Genomic DNA in the vicinity of the rs7143400 was amplified by PCR using the following primers 5'-  
131 GGTTGGGTGTGAATAGGAAT-3' and 5'-TGCATGCCTGATTTATTTGG-3' before digestion  
132 with Tsp45I enzyme (Thermo Scientific). Finally, treated PCR products were analyzed in 2% agarose  
133 gel to visualize the cleavage bands.

134

### 135 **Designing CRISPR/Cas9 and genome editing**

136 gRNA sequences were predicted by Benchling (<http://www.benchling.com>) and cloned into the  
137 GeneArt CRISPR OFP Nuclease Vector (ThermoFischer Scientific) allowing Cas9 and gRNA  
138 expression. Homology directed repair was induced by co-transfection of 71 pb double-stranded DNA  
139 oligonucleotide template including rs7143400-T allele in HEK293 cells (**Supplementary Fig. 1**).  
140 HEK293 clones were isolated by limiting dilution before RFLP genotyping. Sequence integrity of the  
141 *FERMT2* 3'UTR and predicted potential off-target sites were validated by Sanger sequencing  
142 (**Supplementary Fig. 1**).

143

### 144 **Visualization of miRNA expression at the single-cell level**

145 To visualize RNA molecules by fluorescence at single-cell resolution and quantify gene expression,  
146 we used ViewRNA Cell Plus Assay kit (ThermoFischer Scientific) according to the manufacturer's  
147 instructions. Briefly, after fixation and permeabilization, cells were washed 3× with PBS containing  
148 RNase inhibitor and were incubated with probes directed against specific mRNA or miRNA for 2 h at  
149 40°C. After washes, probes were amplified, first, in a pre-amplifier solution and second, in an  
150 amplifier solution, both for 1 h at 40°C. Then, cells were incubated with nucleotide probes stained  
151 with different fluorophores allowing the detection of mRNA or miRNA puncta. This approach was  
152 coupled with immunofluorescence experiments described.

153

### 154 **miRNA quantification in human brain samples**

155 This study was approved by CHU de Québec – Université Laval Research Ethics Committee (#2017-  
156 3017). Frozen human brain tissue (0.5–1.2 g per sample) was obtained from the Harvard Brain Tissue  
157 Resource Center in Belmont, USA, the Brain Endowment Bank in Florida, USA, and the Human  
158 Brain and Spinal Fluid Resource Center in Los Angeles, USA, *via* NIH Neurobiobank. The cohort of  
159 patients included non-dementia controls (N = 30) and AD cases (N = 52) based on neuropathological

160 diagnosis. Upon receipt of the specimens, frozen post-mortem parietal cortex (BA39) was crushed  
161 using a biopulverizer prior to RNA extraction and analysis.

162 Total RNA was extracted from brain tissue (**Supplementary Table 1**) using TRIzol reagent (Ambion,  
163 15596018) according to the manufacturer's instructions. miRNA quantifications were done using the  
164 TaqMan miR Reverse Transcription Kit (Applied Biosystem, Burlington, Canada) and TaqMan  
165 Universal Master Mix (Applied Biosystem, 4324018) following the manufacturer's instructions.  
166 Primers were purchased from ThermoFisher (miR-4504 ID: 464271\_mat; RNU48 ID: 001006; miR-  
167 222-3p ID: 002276). MiR-4504 and miR-222 levels were normalized to RNU48. The relative amounts  
168 of each mature miRNA were calculated using the comparative Ct ( $2^{-\Delta\Delta Ct}$ ) method (Smith et al. 2011).

169

### 170 **Immunoblotting and A $\beta$ quantification**

171 Equal amounts (10-25  $\mu$ g) of cell lysate were collected in RIPA buffer (1 M Tris, 1.5 M NaCl, 0.1%  
172 NP-40, 10% SDS, 100 mM sodium orthovanadate, 0.5% sodium deoxycholate, pH = 7.4) containing  
173 protease inhibitors (Complete mini; Roche Applied Science, Penzberg, Germany), lithium dodecyl  
174 sulfate (LDS), and reducing agent (Invitrogen). Samples were denaturated and analyzed using SDS-  
175 PAGE and the following antibodies: human FERMT2 (RRID:AB\_10727911), amyloid precursor  
176 protein C-terminal domain (RRID:AB\_258409), actin (RRID:AB\_476692),  $\beta$ -amyloid clone 6E10  
177 (RRID:AB\_662798),  $\beta$ -amyloid clone 4G8 (RRID:AB\_662812), Synaptophysin I  
178 (RRID:AB\_887824), PSD95 (RRID:AB\_2619800), GAPDH (RRID:AB\_10615768). Extracellular  
179 culture media were collected in order to dose secreted A $\beta$  using Alpha-LISA assays (AlphaLISA  
180 Amyloid  $\beta_{1-x}$  Kit, AL288C, PerkinElmer) according to the manufacturer's instructions.

181

### 182 **Cell surface biotinylation**

183 HEK293-APP<sup>695WT</sup> cells were transfected with PCDNA4.1, FERMT2<sup>WT</sup> or FERMT2<sup>QW</sup>  
184 (PCDNA4/HisMax, ThermoScientific V86420) for 48 h. Next, cell surface proteins were biotinylated  
185 using sulfo-NHS-SS-biotine (sulfosuccinimidyl-20(biotinamido)ethyl-1,3-dithiopropionate) for 30 min  
186 at 4°C according to the manufacturer's instructions (Cell Surface Protein Isolation Kit, Pierce, 89881).  
187 Then, cells were lysed and immunoprecipitated with streptavidin beads. Precipitated proteins were  
188 eluted from the beads with loading buffer containing 50 mM DTT, heated for 10 min at 95°C and  
189 analyzed by WB.

190

### 191 **Co-immunoprecipitation**

192 Equal amounts of protein were collected in co-immunoprecipitation buffer (10 mM HEPES, 140 mM  
193 NaCl, 0.5% NP-40, pH = 7.4) containing protease inhibitors (Complete mini, Roche Applied Science)  
194 and phosphatase inhibitor (100 mM sodium orthovanadate) and incubated with the primary  $\beta$ -amyloid  
195 antibody clone 4G8 (RRID:AB\_662812) overnight, with gentle rocking. Production of recombinant  
196 C100 fragment was performed as previously described (Sevalle et al. 2009). Co-immunoprecipitation

197 was carried out using Pierce Protein A/G magnetic beads kit (Thermo Scientific, 88802) according to  
198 the manufacturer's instructions. Samples with proteins and antibody complexes were incubated with  
199 25  $\mu$ L (0.25 mg) of A/G magnetic beads previously washed with co-immunoprecipitation buffer. After  
200 1 h of incubation at 4°C, the magnetic beads were washed 3 $\times$ , resuspended with loading buffer (LDS  
201 and reducing agent) for 10 min at RT, and analyzed by WB.

202

### 203 **Immunofluorescence and PLA**

204 Cells were fixed in 4% paraformaldehyde (PFA) for 15 min, washed 3 $\times$  with PBS, and permeabilized  
205 for 5 min with 0.3% Triton X-100. Cells were incubated with 5% normal donkey serum for 2 h at RT  
206 before overnight incubation with the following primary antibodies: human FERMT2  
207 (RRID:AB\_10727911), Kindlin2 (RRID:AB\_2278298), amyloid precursor protein C-terminal domain  
208 (RRID:AB\_258409), APP A4 clone 22C11 (RRID:AB\_94882), Synaptophysin I (  
209 RRID:AB\_887824), PSD95 (RRID:AB\_2619800), Homer (RRID:AB\_2631222),  $\alpha$ -Tubulin  
210 (RRID:AB\_2210391). The cells were then washed 3 $\times$  with PBS and incubated with the following  
211 secondary antibodies raised in donkey (AlexaFluor-conjugated AffiniPure Fragment 405, 488, 594 or  
212 647, Jackson ImmunoResearch), 1:10,000 Hoechst 33342, or 1/40 SiR-Actin probe (SC001,  
213 Spirochrome). Alternatively, Kindlin2 (RRID:AB\_2278298) and APP A4 22C11 (RRID:AB\_94882)  
214 antibodies were used for proximity ligation assay (PLA) according to manufacturer's instructions  
215 (Duolink®, Olink Bioscience).

216

### 217 **Live-cell microscopy for axon elongation and actin dynamics**

218 After DIV5, once the axons reached the axonal chamber of microfluidic devices, the culture medium  
219 was replaced with Neurobasal A without phenol red, supplemented with GlutaMax, 2% B<sub>27</sub>, and 25  
220 mM HEPES. Phase-contrast images of growing axons were acquired every 10 min for 110 min using  
221 Zeiss AxioObserver Z1 microscope equipped with a Prime 95B Scientific CMOS (Photometrics,  
222 Tucson,AZ) camera and 32 $\times$  objective. Movies were analyzed using Fiji MTrack J Plugin (Meijering  
223 et al. 2012) to determine the axon growth speed.

224 To visualize filamentous actin (F-actin) dynamics in the growth cones of elongating axons, neurons  
225 were co-transduced with LifeAct-Ruby at DIV1. At DIV5, growth cones expressing LifeAct-Ruby  
226 were imaged using a Nikon microscope equipped with Yokogawa spinning disk system and a Nikon  
227 CFI Apochromat 100 $\times$  TIRF objective (NA 1.49), in live superresolution mode (66 nm/px). Processed  
228 movies were analyzed using Imaris (Bitplane, Zurich, Switzerland) surface tracking tool to obtain the  
229 speed and direction of F-actin puncta undergoing actin retrograde flow.

230

### 231 **Synaptosome extraction**

232 To verify the presence of proteins at the synaptic level we did a subcellular fractionation as previously  
233 described (Frandemiche et al. 2014). Briefly, cortical neurons were resuspended in a solution (0.32 M



234 sucrose and 10 mM HEPES, pH = 7.4) and were centrifuged at 1,000× *g* for 10 min to remove nuclei  
235 and debris. The supernatant was centrifuged at 12,000× *g* for 20 min to remove the cytosolic fraction.  
236 The pellet was resuspended in a second solution (4 mM HEPES, 1 mM EDTA, pH = 7.4) and was  
237 centrifuged 2× at 12,000× *g* for 20 min. The new pellet was resuspended in a third solution (20 mM  
238 HEPES, 100 mM NaCl, 0.5% Triton X-100, pH = 7.2) for 1 h at 4°C and centrifuged at 12,000× *g* for  
239 20 min. The supernatant collected corresponds to the non-PSD fraction (Triton-soluble). The  
240 remaining pellet was resuspended in a fourth solution (20 mM HEPES, 0.15 mM NaCl, 1% Triton X-  
241 100, 1% deoxycholic acid, 1% SDS, pH = 7.5) for 1 h at 4°C and was centrifuged at 10,000× *g* for 15  
242 min to obtain a supernatant containing the PSD fraction (Triton-insoluble). The different fractions  
243 were then analyzed by WB.

244

### 245 **Quantification of synaptic connectivity**

246 To quantify synaptic connectivity, we transduced primary hippocampal neurons in pre- and/or  
247 postsynaptic compartments of microfluidic devices at DIV1 with lentiviruses carrying shNT and/or  
248 shFERMT2 (MOI = 10). At DIV14 cultures were fixed and immunostained against Synaptophysin I  
249 and Homer pre- and post-synaptic markers, respectively. Synaptic compartments were imaged with  
250 Zeiss LSM880 confocal microscope, using a 63× 1.4 NA objective and the AiryScan superresolution  
251 unit. Images were analyzed with Imaris software (Bitplane; Zürich, Switzerland) by reconstructing  
252 Synaptophysin I and Homer puncta in 3D. The volume and position information of all puncta were  
253 processed using a custom Matlab (MathWorks, Natick, MA) program. This program assigns each  
254 postsynaptic spot to the nearest presynaptic spot (within a distance threshold of 1 μm) and calculates  
255 the number of such assignments for all presynaptic puncta. The percentage of presynaptic spots not  
256 assigned by any postsynaptic spot was consistently used as a read-out of synaptic connectivity.

257

### 258 **Lentivirus injection**

259 For stereotactic injections, C57Bl6/J mice (RRID:IMSR\_JAX:000664) were anesthetized with 4%  
260 isoflurane (2 L/min) and placed in a stereotaxic frame (68528, RWD Life Science, Shenzhen, China)  
261 in which the head of the animal was fixed with a pair of ear bars and a perpendicular tooth bar. During  
262 surgical procedures 1.5% isoflurane (2 L/min) was delivered through a facial mask *via* spontaneous  
263 respiration. Their body temperature was maintained between 36.5 and 37.5°C with a homeothermic  
264 blanket. Head was shaved and Vetedine was applied. Wounds and pressure points were infiltrated with  
265 lidocaine. A skin incision was made along the sagittal midline of the scalp. Craniotomy was made to  
266 target the structures of interest. Lentiviruses were injected in right and left hippocampus (1.5 μL per  
267 hemisphere; 0.2 μL/min). After injections, wound clips were used for skin closure. For the sham  
268 group, surgical procedures were performed without any injection. During the surgery, the level of  
269 anesthesia was regularly verified by testing the nociceptive hind limb withdrawal reflex. Subjects were

270 then allowed to recover in their home cages for at least 7 d before sacrifice for ex-vivo  
271 electrophysiological recordings.

272

### 273 **Hippocampal acute slices preparation**

274 One week after the surgery, sagittal hippocampal brain slices were obtained using standard brain  
275 slicing methods. Mice were deeply anesthetized with isoflurane and decapitated. The brain was  
276 quickly removed and immersed in ice-cold pre-oxygenated artificial cerebrospinal fluid (aCSF)  
277 containing: 124 mM NaCl, 3.75 mM KCl, 2 mM MgSO<sub>4</sub>, 2 mM CaCl<sub>2</sub>, 26.5 mM NaHCO<sub>3</sub>, 1.25 mM  
278 NaH<sub>2</sub>PO<sub>4</sub>, and 10 mM Glucose and was continuously oxygenated (pH = 7.4; 27°C). 350 µm-thick  
279 slices were prepared using a Vibratome (VT 1000S; Leica Microsystems, Bannockburn, IL), and  
280 placed in a holding chamber filled with aCSF. Slices were allowed to recover in these conditions at  
281 least 1 h before recording.

282

### 283 **Electrophysiological recordings**

284 For electrophysiological recordings, a single slice was placed in the recording chamber, submerged  
285 and continuously superfused with gassed (95% O<sub>2</sub>, 5% CO<sub>2</sub>) aCSF at a constant rate (2 mL/min).  
286 Extracellular fEPSPs were recorded in the CA1 stratum radiatum using a glass micropipette filled with  
287 aCSF. fEPSPs were evoked by the electrical stimulation of Schaffer collaterals/commissural pathway  
288 at 0.1 Hz with a glass stimulating electrode placed in the stratum radiatum (100 µsec duration).

289 To test the effect of miRNA-expressing lentiviruses on basal synaptic transmission, Input/Output (I/V)  
290 curves were constructed at the beginning of the experiment. The slope of fEPSPs was measured and  
291 plotted against different intensities of stimulation (from 0 to 100 µA).

292 Stable baseline fEPSPs were recorded by stimulating at 30% maximal field amplitude for 10 min prior  
293 to the beginning of the experiment (single-pulse stimulation every 10 s (0.1 Hz). The same intensity of  
294 stimulation was kept for the remainder of the experiment. For the paired-pulse facilitation (PPF)  
295 protocol, two stimulations were applied with 50, 100, 150, 200, 300, 400 and 500 ms interval. For  
296 long-term potentiation (LTP) protocol, after a 10 min stable baseline period, LTP was induced by the  
297 following stimulation protocol: 3 trains of 100 stimulations at 100 Hz at the same stimulus intensity,  
298 with 20 s intervals between trains. Following this conditioning stimulus, a 1 h test period was recorded  
299 where responses were again elicited by a single-pulse stimulation every 10 s (0.1 Hz) at the same  
300 stimulus intensity. Signals were amplified with an Axopatch 200B amplifier (Molecular Devices,  
301 Union City, CA) digitized by a Digidata 1550 interface (Axon Instruments, Molecular Devices, San  
302 Jose, CA) and sampled at 10 kHz. Recordings were acquired using Clampex (Molecular Devices) and  
303 analyzed with Clampfit (Molecular Devices). Experimenters were blinded to treatment for all  
304 experiments.

305

306

307 **RESULTS**

308

309 **FERMT2 expression is dependent on miRNAs modulating APP metabolism**

310 We used an unbiased screening approach to identify miRNAs that modulate APP metabolism in a  
311 HCS model that allows for the quantification of intracellular APP fragments (Chapuis et al. 2017).  
312 We screened a total of 2,555 mature human miRNAs in a 384-well plate format allowing us to identify  
313 50 miRNAs (top and bottom 1%) with the strongest impact on APP metabolism (**Supplementary**  
314 **Table 2** and **Supplementary Fig. 2**). To determine which genes were potentially regulated by these  
315 top 50 hits, we selected the intersection of predictions resulting from at least four different algorithms  
316 (see methods) and thereby identified 6,009 putative miRNA-target genes. To further refine the list of  
317 predicted genes, we cross-checked them against a list of 832 genes that we previously identified to  
318 have a major impact on APP metabolism in a genome-wide siRNA screening (Chapuis et al. 2017)  
319 (**Supplementary Fig. 3**). This resulted in 180 common genes that are putative targets of 41 miRNAs.  
320 To determine if any of these 180 genes were preferentially regulated by this pool of 41 miRNAs, we  
321 performed 1 million drawing lots of 41 miRNAs among the 2,555 tested and compared them against  
322 the list of miRNAs predicted to bind in the 3'-UTR of each of the 180 genes (**Supplementary Fig. 3**).  
323 The AD genetic risk factor *FERMT2* (encoding Kindlin-2) was among the most significant genes (*p*-  
324 value  $< 2.77 \times 10^{-4}$  after Bonferroni correction) that strongly modulate APP metabolism, and whose  
325 expression are potentially regulated by miRNAs that also strongly modulate APP metabolism.  
326 According to our screening, four miRNAs were predicted to target *FERMT2* 3'UTR: miR-582-5p,  
327 miR-200b-3p, miR-221-3p and miR-222-3p (**Fig. 1a**).

328

329 **miRNA-dependent FERMT2 expression and genetic variation associated with AD risk**

330 Our data indicate that regulation of the *FERMT2* expression is dependent on miRNAs and we aimed  
331 to assess whether genetic variations associated with AD risk may modulate the miRNA-dependent  
332 expression of *FERMT2*. None of the variants localized within the *FERMT2* 3'-UTR were predicted to  
333 modify the binding of miR-582-5p, miR-200b-3p, miR-221-3p, or miR-222-3p to this region  
334 (Supplementary methods). In contrast, we had previously identified an AD-associated variant  
335 (rs7143400), where the minor T allele creates an 8-mer binding site for miR-4504 within the 3'-UTR  
336 of *FERMT2* (Delay et al. 2016) (**Supplementary Fig. 4**). Supporting these predictions, we observed  
337 that miR-4504 led to reduced luciferase expression only in the presence of *FERMT2* 3'UTR  
338 rs7143400-T allele, whereas the four other miRNAs were able to induce a down-regulation regardless  
339 of the rs7143400 allele (**Fig 1b**).

340 We then assessed the impact of these five miRNAs on endogenous *FERMT2* expression levels after  
341 their transfection in either HEK293<sup>WT</sup> or rs7143400-mutated HEK293 cell lines (HEK293<sup>rs7143400-G/T</sup>)  
342 generated by CRISPR-Cas9 technology (**Fig. 1c** and **Supplementary Fig. 1 and 5**). Accordingly,  
343 transfection of miR-582-5p, miR-200b-3p, miR-221-3p, or miR-222-3p in HEK293 cells led to

344 reduced FERMT2 expression whatever their genotype while transfection of miR-4504 decreased the  
345 endogenous FERMT2 expression only in the HEK293<sup>rs7143400-G/T</sup> cell line (**Fig. 1d** and **e**). Similar  
346 effects were observed in HeLa cells that were genotyped to be heterozygous for rs7143400 (**Fig. 1c, d**  
347 and **e** and **Supplementary Fig. 5**).

348

### 349 **Impact of miRNAs targeting FERMT2 on APP metabolism**

350 These five miRNAs are thus potential candidates to modulate APP metabolism through a direct down-  
351 regulation of FERMT2. However, these miRNAs can also potentially target others genes strongly  
352 modulating APP metabolism (**Supplementary Table 3**). We reasoned that if a candidate miRNA  
353 affects APP metabolism mainly through down-regulating FERMT2, this candidate miRNA would  
354 have similar effects on APP metabolism as the direct FERMT2 down-regulation by siRNAs we had  
355 previously demonstrated, i.e. leading an increase of both intra- and extracellular byproducts of APP  
356 (Chapuis et al. 2017). To investigate this hypothesis, we used the data generated in our HCS approach  
357 (based on HEK293 cell line stably over-expressing a mCherry-APP<sup>695WT</sup>-YFP) in order to quantify  
358 intracellular byproducts of APP (Sannerud et al. 2011; Chapuis et al. 2017) and we also measured A $\beta$   
359 and sAPP $\alpha$  secretion after miR-582-5p, miR-200b-3p, miR-221-3p, or miR-222-3p transfections.

360 Only miR-582-5p and miR-222-3p showed similar effects as FERMT2 down-regulation (Chapuis et  
361 al. 2017), *i.e.*, they increased the levels of intracellular APP metabolites tagged by mCherry and YFP  
362 and increased A $\beta$  and sAPP $\alpha$  secretion (**Fig. 2a** and **b**).

363 Since the potential effects of miR-4504 would depend on the presence of the rs7143400 minor T  
364 allele, we were not able to test for its impact in our HCS model. We nevertheless took advantage of  
365 HEK293<sup>rs7143400-G/T</sup> cells by co-transfecting them with miR-4504 and mCherry-APP<sup>695WT</sup>-YFP cDNA  
366 in order to mimic our HCS model. When compared to HEK293<sup>rs7143400-G/G</sup>, the transfection of miR-  
367 4504 in HEK293<sup>rs7143400-G/T</sup> led to an accumulation of intracellular APP mCherry and YFP-tagged  
368 metabolites and an increase of A $\beta$  and sAPP $\alpha$  secretion (**Fig. 2c** and **d**). MiR-4504 showed similar  
369 effects as FERMT2 down-regulation, and this observation further support that miR-4504 regulates  
370 APP metabolism as a function of the FERMT2 rs7143400 variant.

371 In conclusion, we characterized that regulation of FERMT2 expression by miRNAs impacts APP  
372 metabolism, and potentially in a genetics-dependent manner.

373

### 374 **miRNA expression in different hippocampal cell types and in AD brains**

375 To provide further physiological relevance to our findings, we first combined classical  
376 immunocytochemistry with RNA hybridization which allows for the detection of miRNAs at single-  
377 copy sensitivity. We observed that miR-200, miR-222 and miR-4504 were mainly expressed in  
378 neurons when compared to astrocytes (**Fig. 3a**). We next measured the expression levels of these  
379 miRNAs in the post-mortem brain samples from 52 AD patients and 30 control subjects. We observed  
380 that the expression levels of miR-200 and miR-4504 were significantly higher in AD brains than in

381 controls (**Fig. 3b**). Collectively, these data suggest that endogenous FERMT2 expression and its  
382 impact on APP metabolism are dependent on the expression of several miRNAs, two of which are  
383 over-expressed in the brains of AD cases and, among these two, one impacts APP metabolism in the  
384 presence of a genetic variant associated with AD risk.

385

### 386 **Pathway analyses suggest FERMT2/APP interaction to be involved in axonal growth**

387 Little is known about the physiological processes that require the regulation of APP expression and/or  
388 its metabolism by miRNAs. To obtain a list of potential physiological pathways to be further  
389 investigated, pathway enrichment analysis was performed using the 41 candidate miRNAs that  
390 strongly modified APP metabolism in our HCS (**Supplementary Table 2**). This analysis revealed that  
391 the candidate miRNAs are predicted to regulate neuronal pathways, such as axonal guidance (**Table**  
392 **1a**). Since these 41 miRNAs potentially target 180 genes that strongly modulate APP metabolism  
393 (**Supplementary Table 3**), we also performed pathway-enrichment analysis using these 180 genes.  
394 This analysis revealed that these genes are predicted to be involved in axonal guidance among others  
395 (**Table 1b**). In conclusion, both miRNAs and genes modulating APP metabolism, *e.g.*, FERMT2,  
396 potentially play a role in axonal guidance.

397 APP is already known to be enriched in axonal growth cones during nervous system development and  
398 acts as a co-receptor for axon guidance and cell migration cues through its interaction with the  
399 extracellular matrix (Soldano & Hassan 2014) (Sosa et al. 2013). We thus investigated the potential  
400 involvement of FERMT2 in axonal growth. Using primary neurons cultured in microfluidic devices  
401 that fluidically isolate axons from their cell bodies, we first observed the co-localization of  
402 endogenous FERMT2 with APP in the growth cones (**Fig. 4a**). We then addressed the impact of  
403 FERMT2 silencing on axonal growth cone morphology using lentiviral vectors expressing either  
404 shRNA against FERMT2 (shFERMT2) or a non-targeting shRNA (shNT). Actin staining revealed that  
405 FERMT2 under-expression led to a significant decrease in growth cone area ( $9.13 \pm 0.71$  vs  $12.79 \pm 1.10$   
406  $\mu\text{m}^2$ ), as well as in the angular dispersion of growth cone filopodia during axonal growth ( $0.67 \pm 0.04$   
407 vs  $0.84 \pm 0.02$ ) (**Fig. 4b and Supplementary Fig. 6**). Of note, no significant impact on actin retrograde  
408 flow rate was observed ( $0.166 \pm 0.003$  vs  $0.157 \pm 0.002$   $\mu\text{m/s}$ ). These observations suggest a potential  
409 impairment of the exploration behavior of the growth cones due to FERMT2 silencing, but not an  
410 effect on actin dynamics *per se*. FERMT2 under-expression was also associated with an accumulation  
411 of endogenous APP in the growth cones ( $1.38 \pm 0.11$  vs  $0.85 \pm 0.08$ , after normalization by the growth  
412 cone area).

413 By performing proximity ligation assay (PLA), we observed PLA-FERMT2/APP signals in axonal  
414 growth cones (**Fig. 4a**), suggesting a potential function of the FERMT2/APP complex in axon growth  
415 behavior. To address this, we first tested the possibility that APP and FERMT2 form a protein-protein  
416 complex *via* three complementary approaches: (i) Pull-down of endogenous APP from hippocampal  
417 primary neuronal culture extracts co-immunoprecipitated endogenous FERMT2 (**Fig. 4c**). (ii) Over-

418 expression of FERMT2<sup>WT</sup> was also able to pull-down the recombinant intracellular domain of APP  
419 (**Fig. 4d**). (iii) In addition, we generated a Q<sub>621</sub>W<sub>622</sub>AA FERMT2 mutant (FERMT2<sup>QW</sup>) which was  
420 previously shown to abolish the interaction between the FERMT2 F3 domain and the NxTY motif of  
421 Integrin-β3 (which is also present within the intracellular domain of APP) (Ma et al. 2008).  
422 Remarkably, when over-expressed in HEK293 cells, FERMT2<sup>QW</sup> was not able to pull-down the  
423 recombinant intracellular domain of APP. Cumulatively, these findings support a direct interaction  
424 between FERMT2 and APP. Based on the recently solved crystal structure of FERMT2 in complex  
425 with the integrin-β3-tail (Li et al. 2017), we built a structural model of the FERMT2/APP complex  
426 (**Fig. 4e**), supporting our hypothesis that a protein-protein interaction exists between FERMT2 and  
427 APP.

428 We next assessed the biological impact of the FERMT2/APP interaction on APP metabolism. By  
429 performing extracellular biotinylation experiments, we observed that FERMT2 over-expression in  
430 HEK293-APP<sup>695wt</sup> cell line decreased the levels of APP at the cell surface, an effect that was abolished  
431 by the presence of the QW mutation (**Fig. 4f**). Further, a dominant negative effect of the FERMT2<sup>QW</sup>  
432 mutant was observed: its over-expression impacted APP metabolism similarly to FERMT2 silencing,  
433 *i.e.*, resulting in increased mature APP at the cell surface and increased Aβ production, as previously  
434 reported (Chapuis et al. 2017). Altogether, our data suggest that a FERMT2/APP interaction is  
435 necessary for FERMT2 to have an impact on APP metabolism.

436 In order to characterize in-depth the impact of FERMT2 and/or APP expression on axonal growth, we  
437 conducted time-lapse microscopy and measured axon growth speed at DIV5 following lentiviral  
438 transduction (shNT, shFERMT2, or shAPP) of neurons in microfluidic devices at DIV1. FERMT2  
439 silencing led to 31.7% increase in axon growth speed (**Fig. 5 and Supplementary Fig. 6**). Conversely,  
440 APP under-expression led to 16.7% decrease in axon growth speed. Remarkably, silencing of APP  
441 was able to fully abolish the effect of FERMT2 under-expression on axon growth speed, suggesting  
442 that APP was required for the molecular mechanism by which FERMT2 controls the axon growth  
443 speed. In addition, we observed that FERMT2<sup>QW</sup> mutant over-expression was able to induce 15.9%  
444 increase in axon growth speed (**Fig. 5**). Since over-expression of FERMT2<sup>WT</sup> did not show any  
445 impact, these data also suggested a potential dominant negative effect of the FERMT2<sup>QW</sup> mutant and  
446 further supported the involvement of FERMT2/APP complex in axonal growth.

447

#### 448 **FERMT2 is present at the synapse and controls synaptic connectivity**

449 Next, we investigated the impact of FERMT2 silencing on neuronal maturation at DIV14. First, co-  
450 staining between FERMT2 and synaptic markers (Synaptophysin and Homer) suggested the  
451 localization of FERMT2 at the synapse (**Fig. 6a**). The presence of FERMT2 in both pre- and  
452 postsynaptic compartments was confirmed by synaptosomal purification (**Fig. 6b**). To control shRNA  
453 expression separately in pre- or postsynaptic neurons, hippocampal neurons were cultured in  
454 microfluidic devices that promote synapse formation in an isolated chamber (Taylor et al. 2010).

455 Thanks to the use of narrow microchannels, these devices spatially isolate neurites from their cell  
456 bodies and allow lentiviral transductions to be conducted in different compartments, thereby allowing  
457 us to silence FERMT2 expression at the pre- and/or postsynaptic levels (**Fig. 6c and Supplementary**  
458 **Fig. 6**). The effects of shRNA expression (DIV1) on synaptic connectivity were assessed by confocal  
459 microscopy of synaptic markers (DIV14) followed by three-dimensional image segmentation and  
460 quantification. Under-expression of FERMT2 in the pre-synaptic chamber led to a decrease in synaptic  
461 connectivity, whereas no such effect was observed when under-expressing FERMT2 in the post-  
462 synaptic compartment (**Fig. 6d**). Altogether, our data suggest that FERMT2 expression is required for  
463 synapse connectivity. Moreover, PLA-FERMT2/APP signals were co-localized with Synaptophysin  
464 and Homer puncta (**Fig. 6e**), supporting the possibility of the involvement of the FERMT2/APP  
465 complex in synapses.

466

#### 467 **FERMT2 expression regulates synaptic plasticity in an APP dependent manner**

468 We sought to establish the functional impact of FERMT2 and/or APP silencing on paired-pulse  
469 facilitation (PPF) and long-term potentiation (LTP) in *ex vivo* mouse (10-week-old male) hippocampal  
470 slices, after stereotactic lentivirus injection allowing for the expression of shNT, shFERMT2, shAPP,  
471 or shFERMT2+shAPP.

472 Broadly speaking, PPF arises due to increased presynaptic  $Ca^{2+}$ , which leads to the release of  
473 neurotransmitter in two distinct waves. In this situation, two action potentials in the presynaptic cell  
474 produce two excitatory postsynaptic potentials (EPSPs) in the postsynaptic cell: the first action  
475 potential produces a first EPSP, but the second action potential produces an EPSP that is larger than  
476 the EPSP produced by the first. PPF modulation therefore highlights a modulation in presynaptic  
477 neurotransmitter release (Gebhardt et al. 2019). Using this read-out as a proxy for presynaptic  
478 function, we observed a significant decrease in PPF in shFERMT2-infected mice compared to shNT-  
479 infected control mice (**Fig. 7a**). This PPF impairment however was rescued when APP was also down-  
480 regulated (shAPP+shFERMT2 group).

481 In separate experiments, tetanic stimulation was delivered to the Shaffer collaterals (SC) in order to  
482 induce LTP in hippocampal slices (**Fig. 7b**). Tetanic stimulation of the SC resulted in a robust, long-  
483 lasting potentiation of the field excitatory postsynaptic potential (fEPSP) slope in slices from mice  
484 infected with shNT and with shAPP, whereas LTP was impaired in slices from shFERMT2-infected  
485 mice. This suggests that an LTP deficit was observed in hippocampal slices infected with shFERMT2,  
486 but not in those infected with shAPP (**Fig. 7c and 7d**). Remarkably, this deficit was abolished when  
487 both APP and FERMT2 were silenced, suggesting that APP was required for the molecular  
488 mechanism by which FERMT2 impacts LTP.

489 Importantly, in these slices, no significant difference was observed for the normalized average slope of  
490 the evoked fEPSP, indicating no alteration of the CA1 basal synaptic transmission occurred in any of  
491 the groups analyzed (**Fig. 7e, Supplementary Fig. 7**).

492 Altogether, these data are in agreement with our previous observations that FERMT2 is involved in  
493 the pre-synaptic compartment and modulates synaptic connectivity in an APP-dependent manner.

494

## 495 **DISCUSSION**

496

497 As in other multifactorial diseases, GWAS in AD are agnostic approaches, and how a genetic risk  
498 factor is implicated in pathophysiological processes is typically unknown. Sometimes, even the  
499 physiological functions of an AD genetic risk factor in the brain are not known. Understanding the  
500 role of these genes is thus a challenge that requires several key questions to be addressed: (i) Does the  
501 corresponding protein interact (directly or indirectly) with other key players and pathways known to  
502 be involved in AD? (ii) What is (are) the functional variant(s) responsible for the GWAS signal and  
503 does this (do these) variant(s) impact the biological function of the corresponding protein and its  
504 interaction with key players of AD?

505 To answer these questions, we developed systematic approaches to determine the genes that are  
506 involved in APP metabolism, a major player in AD development. To this end, we had previously  
507 developed an HCS, based on the quantification of intracellular APP fragments, to measure the impact  
508 of under-expression of 18,107 genes (*via* siRNA pools) on APP metabolism (Chapuis et al. 2017). In  
509 the current study, we screened the impact of the over-expression of 2,555 miRNAs on APP  
510 metabolism with the hypothesis that genes (i) that modulate the APP metabolism and (ii) whose  
511 expression levels are regulated by miRNAs that also modulate the APP metabolism are likely some of  
512 the key actors controlling the APP metabolism and functions. The convergence of these two agnostic  
513 screens highlighted FERMT2, a GWAS-defined genetic risk factor of AD, for which almost nothing is  
514 known in the cerebral and AD contexts.

515 We demonstrated that a direct interaction between FERMT2 and APP –through the F3 domain of  
516 FERMT2 and the NxTY motif within APP’s intracellular domain– is necessary for FERMT2 to have  
517 an impact on APP metabolism. Moreover, we observed that the FERMT2/APP interaction could be  
518 involved in the regulation of axonal growth, in line with APP’s function within the growth cone (Sosa  
519 et al. 2013) (data we replicated in this study). It has been reported that FERMT2 is required for the  
520 recruitment and activation of focal adhesion kinase and the triggering of integrin signaling  
521 (Theodosiou et al. 2016). In neurons, the focal adhesion pathway is involved in synaptic density and  
522 activity through regulating the dendritic spine shape, stability, and the signalling machinery therein  
523 (Hotulainen & Hoogenraad 2010). That is why we also analyzed synaptic plasticity, a read-out highly  
524 relevant to AD, where synaptic dysfunction/loss is one of the earliest events observed. FERMT2  
525 under-expression had detrimental effects on PPF (presynaptic) and LTP (postsynaptic). Remarkably,  
526 in both cases, the detrimental effect of FERMT2 under-expression was dependent on APP expression.  
527 In this context, it is important to note that numerous evidence indicate that presynaptic physiological



528 functions involving APP, which has been recently proposed as a structural and functional regulator of  
529 the hippocampal presynaptic active zone (Weingarten et al. 2017), could be major molecular players in  
530 AD (Barthet & Mulle 2020). As FERMT2 silencing leads to an accumulation of full-length APP and  
531 all its by-products (including A $\beta$  peptides), we can hypothesize that these accumulations could be  
532 involved in the synaptic dysfunction observed due to FERMT2 under-expression, although further  
533 experiments are needed to decipher the potential causal link between FERMT2 and APP, *i.e.*, to  
534 determine whether FERMT2 impacts the function of full-length APP or invokes A $\beta$  synaptotoxicity.  
535 This is of particular interest, since APP shedding strongly enhances its cell adhesion and synaptogenic  
536 activity (Stahl et al. 2014). Moreover, APP's intracellular domain is required for normal synaptic  
537 morphology and synaptic plasticity, suggesting that its intracellular interaction partners could be  
538 required for proper synaptic function (Klevanski et al. 2015). Remarkably, we have recently proposed  
539 a circular model of AD pathogenesis, where the core of the focal adhesion pathway –which FERMT2  
540 and APP are part of– may participate in the dysfunction of synaptic plasticity in AD (Dourlen et al.  
541 2019).

542 We have also identified that *FERMT2* expression level is highly regulated by miRNAs which could be  
543 preferentially expressed in neurons. In addition, we previously identified the rs7143400 variant located  
544 in *FERMT2* 3'UTR to be susceptible to alter a binding site for miR-4504 (Delay et al. 2016). Here, in  
545 addition to *in silico* prediction suggesting the impact of this variant on miRNA binding  
546 (**Supplementary Fig. 4**), we demonstrate that this variant is functional: the AD-associated rs7143400  
547 T allele down-regulates *FERMT2* and modulates APP metabolism *via* its interaction with miR-4504.  
548 Remarkably, we observed that miR-4504 is over-expressed in the brains of AD cases compared to  
549 controls, and is mainly expressed in neurons in primary mixed hippocampal cultures.

550 Together, our data indicate that a deleterious over-expression of miR-4504 can lead to a decrease in  
551 *FERMT2* expression in individuals bearing the rs7143400 minor T allele, which subsequently  
552 modulates APP metabolism. Interestingly, similar mechanism has been reported for genetic variant  
553 associated with AD risk in APP 3'UTR which regulates APP expression through miRNA binding (G  
554 et al. 2016). Supporting a link between *FERMT2* and APP metabolism, studies from cohorts of  
555 patients have reported an association between variants in *FERMT2* gene and A $\beta$  in CSF (Chapuis et al.  
556 2017) and brain amyloidosis (Apostolova et al. 2018).

557 Here, we propose that *FERMT2* down-regulation at the earliest stage of AD would depend in part on  
558 (i) the miR-4504 expression, (ii) cerebral cell type (*i.e.*, neurons), and (iii) the presence of the  
559 rs7143400 minor T allele (observed in 9% of Caucasians). Unfortunately, it is important to keep in  
560 mind that all these constraints will make difficult, if not impossible, to detect such a miRNA-  
561 dependent decrease in *FERMT2* mRNA levels. Of note, this point may also underline the limitation of  
562 expression databases in deciphering the mechanisms underlying the functional effects of GWAS  
563 variants, for they do not allow capturing (even hide) subtle mechanisms.

564 In publicly-available RNA-seq analyses (Mayo Clinic Brain Bank), an over-expression of FERMT2  
565 mRNA has been observed in post-mortem human temporal cortex of AD patients relative to healthy  
566 controls (Sullivan et al. 2018). Even though a small sample size did not allow us to observe such a  
567 variation in FERMT2 mRNA levels, we nevertheless detected an increase in FERMT2 protein levels  
568 as a function of Braak stage, especially at later stages (**Supplementary Fig. 8**). This point is of  
569 particular importance since in the Genotype-Tissue Expression Database (GTEx Consortium et al.  
570 2015), FERMT2 variants associated with an increase in AD risk at the genome-wide significance level  
571 are also part of an expression quantitative trait locus, significantly associated with decreased brain  
572 expression of FERMT2 mRNA (sentinel variant in GWAS rs17125924; -18%;  $p$ -value =  $2 \times 10^{-6}$ ). Of  
573 note, there is a strong linkage disequilibrium between rs7143400 and the GWAS hit rs17125924 ( $R^2 =$   
574 0.78) and rs7143400 has a lower Minor Allele Frequency (MAF = 0.09) and subsequently lower  
575 association ( $p = 7.14 \times 10^{-5}$ ) than rs17125924 (MAF = 0.20;  $p = 6.6 \times 10^{-7}$ ). Altogether, these results  
576 strongly support the notion that FERMT2 down-regulation is deleterious at the earliest stages of the  
577 disease, whereas FERMT2 over-expression may occur as a pathological consequence at a later stage.  
578 In conclusion, we propose that FERMT2 under-expression through miRNAs and/or genetic regulation  
579 leads to synaptic dysfunction in an APP-dependent manner. Our hypothesis may thus call for new  
580 therapeutic approaches in AD targeting FERMT2 and/or APP function, rather than A $\beta$  peptide  
581 production/clearance.

582 **Acknowledgements**

583 F. E. benefited from a doctoral grant co-funded by Hauts-de-France Regional Council and Institut  
584 Pasteur de Lille. The authors thank the BICeL and EquipEx ImagInEx HCS platforms of the Institut  
585 Pasteur de Lille and Alexandre Vandeputte for technical assistance. The authors thank Karine Blary at  
586 the IEMN Lille for the microfabrication work. This work was partly supported by the French  
587 RENATECH network. This study was funded by INSERM, Institut Pasteur de Lille, the Centres of  
588 Excellence in Neurodegeneration-ANR program (CoEN, GWAS in AD: focus on microRNA), the  
589 Canadian Institute of Health Research (CHIR), la Fondation Alzheimer (Syn-Alz), the EU Joint  
590 Programme – Neurodegenerative Diseases Research (JPND; 3DMiniBrain) and Fondation Vaincre  
591 Alzheimer (FR-17006p). This work was also funded by the Lille Métropole Communauté Urbaine and  
592 the French government’s LABEX DISTALZ program (development of innovative strategies for a  
593 transdisciplinary approach to Alzheimer’s disease). This work was supported for M.H by Academy of  
594 Finland (grant number 307866), Sigrid Jusélius Foundation and the Strategic Neuroscience Funding of  
595 the University of Eastern Finland. The authors thank the vectorology platform Transbiomed for  
596 lentivirus production.

597

598 **Author contributions**

599 J.-C. L. and J. C. designed and supervised research. A. F., F. E., F. C. and C. B. performed APP  
600 metabolism and FERMT2/APP interaction analyses. X. H. developed in silico model for  
601 FERMT2/APP interaction. F. E. and D. K. performed and analyzed axon growth experiments. A. C.,  
602 A. F., J. D. and J. C. developed Crispr/Cas9 model and/or performed subsequent analyses. C. D., A.-C.  
603 V., A. F. and B. G.-B. designed and/or performed miRNA screening and/or statistical analyses. S. H.  
604 and M. F. performed and analyzed electrophysiology experiments. A. F., T. M., F. D. and S. D.  
605 performed primary neuronal cultures. M. M., M. T., I. P. and M. H. analyzed transcriptomic and/or  
606 proteomic data of FERMT2 expression in brains. E. B. and S. S. H. performed miR expression  
607 quantification in brains. F. E., N. M., D. K. and J. C. participated in image acquisition and analyses of  
608 APP/FERMT2 interaction and/or synapse density. F. E., P. A., J. D., D. K., J.-C. L. and J. C. wrote  
609 and/or revised the paper.

610

611 **Conflicts of interest**

612 S. H. and M. F. are full-time employees of E-Phy-Science SA. C. D. has been an employee of Janssen  
613 Pharmaceutica since her departure from the laboratory Inserm U1167 in 2016.

614

615 **References**

- 616 Andersen, O.M. et al., 2005. Neuronal sorting protein-related receptor sorLA/LR11 regulates  
617 processing of the amyloid precursor protein. *Proceedings of the National Academy of Sciences of*  
618 *the United States of America*, 102(38), pp.13461–6. Available at:  
619 <http://www.pnas.org/cgi/doi/10.1073/pnas.0503689102> [Accessed January 4, 2017].
- 620 Apostolova, L.G. et al., 2018. Associations of the Top 20 Alzheimer Disease Risk Variants With Brain  
621 Amyloidosis. *JAMA Neurology*, 75(3), p.328. Available at:  
622 <http://www.ncbi.nlm.nih.gov/pubmed/29340569> [Accessed April 27, 2018].
- 623 Barthet, G. & Mulle, C., 2020. Presynaptic failure in Alzheimer’s disease. *Progress in neurobiology*,  
624 p.101801. Available at: <http://www.ncbi.nlm.nih.gov/pubmed/32428558> [Accessed July 10,  
625 2020].
- 626 Blasiak, A., Lee, G.U. & Kilinc, D., 2015. Neuron Subpopulations with Different Elongation Rates  
627 and DCC Dynamics Exhibit Distinct Responses to Isolated Netrin-1 Treatment. *ACS chemical*  
628 *neuroscience*, 6(9), pp.1578–90. Available at:  
629 <http://pubs.acs.org/doi/10.1021/acschemneuro.5b00142> [Accessed September 11, 2019].
- 630 Chapuis, J. et al., 2017. Genome-wide, high-content siRNA screening identifies the Alzheimer’s  
631 genetic risk factor FERMT2 as a major modulator of APP metabolism. *Acta Neuropathologica*,  
632 133(6), pp.955–966. Available at: <http://www.ncbi.nlm.nih.gov/pubmed/27933404> [Accessed  
633 August 19, 2019].
- 634 Checler, F., 1995. Processing of the beta-amyloid precursor protein and its regulation in Alzheimer’s  
635 disease. *Journal of neurochemistry*, 65(4), pp.1431–44. Available at:  
636 <http://www.ncbi.nlm.nih.gov/pubmed/7561836> [Accessed July 13, 2016].
- 637 Delay, C. et al., 2016. miRNA-dependent target regulation: functional characterization of single-  
638 nucleotide polymorphisms identified in genome-wide association studies of Alzheimer’s disease.  
639 *Alzheimer’s research & therapy*, 8(1), p.20. Available at:  
640 <http://www.ncbi.nlm.nih.gov/pubmed/27215977> [Accessed June 17, 2016].
- 641 Dourlen, P. et al., 2019. The new genetic landscape of Alzheimer’s disease: from amyloid cascade to  
642 genetically driven synaptic failure hypothesis? *Acta neuropathologica*, 138(2), pp.221–236.  
643 Available at: <http://link.springer.com/10.1007/s00401-019-02004-0> [Accessed August 23, 2019].
- 644 Dowling, J.J. et al., 2008. Kindlin-2 is an essential component of intercalated discs and is required for  
645 vertebrate cardiac structure and function. *Circulation research*, 102(4), pp.423–31. Available at:  
646 <http://www.ncbi.nlm.nih.gov/pubmed/18174465> [Accessed January 26, 2015].
- 647 Frandemiche, M.L. et al., 2014. Activity-dependent tau protein translocation to excitatory synapse is  
648 disrupted by exposure to amyloid-Beta oligomers. *The Journal of neuroscience : the official*  
649 *journal of the Society for Neuroscience*, 34(17), pp.6084–97. Available at:  
650 <http://www.ncbi.nlm.nih.gov/pubmed/24760868> [Accessed April 29, 2014].
- 651 G, N. et al., 2016. Mutation in the 3’ untranslated Region of APP as a Genetic Determinant of Cerebral  
652 Amyloid Angiopathy. *European journal of human genetics : EJHG*, 24(1). Available at:  
653 <https://pubmed.ncbi.nlm.nih.gov/25828868/> [Accessed June 16, 2020].
- 654 Gebhardt, C. et al., 2019. Priming of LTP in amygdala and hippocampus by prior paired pulse  
655 facilitation paradigm in mice lacking brain serotonin. *Hippocampus*, 29(7), pp.610–618.  
656 Available at: <http://www.ncbi.nlm.nih.gov/pubmed/30457189> [Accessed July 10, 2020].

- 657 GTEx Consortium, K.G. et al., 2015. Human genomics. The Genotype-Tissue Expression (GTEx)  
658 pilot analysis: multitissue gene regulation in humans. *Science (New York, N.Y.)*, 348(6235),  
659 pp.648–60. Available at: <http://www.sciencemag.org/cgi/doi/10.1126/science.1262110>  
660 [Accessed September 3, 2019].
- 661 Hardy, J., 1997. Amyloid, the presenilins and Alzheimer’s disease. *Trends in neurosciences*, 20(4),  
662 pp.154–9. Available at: <http://www.ncbi.nlm.nih.gov/pubmed/9106355> [Accessed November 2,  
663 2016].
- 664 Hardy, J. & Selkoe, D.J., 2002. The amyloid hypothesis of Alzheimer’s disease: progress and  
665 problems on the road to therapeutics. *Science.*, %19;297(5580), pp.353–356.
- 666 Hotulainen, P. & Hoogenraad, C.C., 2010. Actin in dendritic spines: connecting dynamics to function.  
667 *The Journal of cell biology*, 189(4), pp.619–29. Available at:  
668 <http://www.jcb.org/lookup/doi/10.1083/jcb.201003008> [Accessed November 18, 2019].
- 669 Jansen, I.E. et al., 2019. Genome-wide meta-analysis identifies new loci and functional pathways  
670 influencing Alzheimer’s disease risk. *Nature Genetics*, 51(3), pp.404–413. Available at:  
671 <http://www.ncbi.nlm.nih.gov/pubmed/30617256> [Accessed September 4, 2019].
- 672 Jay, T.R. et al., 2017. Disease Progression-Dependent Effects of TREM2 Deficiency in a Mouse  
673 Model of Alzheimer’s Disease. *The Journal of neuroscience : the official journal of the Society*  
674 *for Neuroscience*, 37(3), pp.637–647. Available at:  
675 <http://www.ncbi.nlm.nih.gov/pubmed/28100745> [Accessed July 8, 2020].
- 676 Jonsson, T. et al., 2012. A mutation in APP protects against Alzheimer’s disease and age-related  
677 cognitive decline. *Nature*, 488(7409), pp.96–99. Available at:  
678 <http://www.nature.com/doi/10.1038/nature11283>.
- 679 Kaech, S. & Banker, G., 2006. Culturing hippocampal neurons. *Nature protocols*, 1(5), pp.2406–15.  
680 Available at: <http://www.nature.com/articles/nprot.2006.356> [Accessed September 19, 2019].
- 681 Kim, J., Basak, J.M. & Holtzman, D.M., 2009. The role of apolipoprotein E in Alzheimer’s disease.  
682 *Neuron*, 63(3), pp.287–303. Available at: <http://www.ncbi.nlm.nih.gov/pubmed/19679070>  
683 [Accessed July 8, 2020].
- 684 Klevanski, M. et al., 2015. The APP Intracellular Domain Is Required for Normal Synaptic  
685 Morphology, Synaptic Plasticity, and Hippocampus-Dependent Behavior. *Journal of*  
686 *Neuroscience*, 35(49), pp.16018–16033. Available at:  
687 <http://www.ncbi.nlm.nih.gov/pubmed/26658856> [Accessed January 31, 2017].
- 688 Kunkle, B.W. et al., 2019. Genetic meta-analysis of diagnosed Alzheimer’s disease identifies new risk  
689 loci and implicates A $\beta$ , tau, immunity and lipid processing. *Nature Genetics*, 51(3), pp.414–430.  
690 Available at: <http://www.ncbi.nlm.nih.gov/pubmed/30820047> [Accessed July 12, 2019].
- 691 Li, H. et al., 2017. Structural basis of kindlin-mediated integrin recognition and activation.  
692 *Proceedings of the National Academy of Sciences of the United States of America*. Available at:  
693 <http://www.ncbi.nlm.nih.gov/pubmed/28739949> [Accessed July 31, 2017].
- 694 Ma, Y.-Q. et al., 2008. Kindlin-2 (Mig-2): a co-activator of beta3 integrins. *The Journal of cell*  
695 *biology*, 181(3), pp.439–46. Available at:  
696 <http://www.pubmedcentral.nih.gov/articlerender.fcgi?artid=2364684&tool=pmcentrez&renderty>  
697 [pe=abstract](http://www.pubmedcentral.nih.gov/articlerender.fcgi?artid=2364684&tool=pmcentrez&renderty) [Accessed October 15, 2014].

- 698 Meijering, E., Dzyubachyk, O. & Smal, I., 2012. Methods for cell and particle tracking. *Methods in*  
699 *enzymology*, 504, pp.183–200. Available at:  
700 <https://linkinghub.elsevier.com/retrieve/pii/B9780123918574000094> [Accessed September 11,  
701 2019].
- 702 Morris, G.P., Clark, I.A. & Vissel, B., 2018. Questions concerning the role of amyloid- $\beta$  in the  
703 definition, aetiology and diagnosis of Alzheimer's disease. *Acta Neuropathologica*, 136(5),  
704 pp.663–689. Available at: <http://www.ncbi.nlm.nih.gov/pubmed/30349969> [Accessed September  
705 4, 2019].
- 706 Nicolas, G. et al., 2016. SORL1 rare variants: a major risk factor for familial early-onset Alzheimer's  
707 disease. *Molecular Psychiatry*, 21(6), pp.831–836. Available at:  
708 <http://www.ncbi.nlm.nih.gov/pubmed/26303663> [Accessed April 21, 2017].
- 709 Sannerud, R. et al., 2011. ADP ribosylation factor 6 (ARF6) controls amyloid precursor protein (APP)  
710 processing by mediating the endosomal sorting of BACE1. *Proceedings of the National Academy*  
711 *of Sciences of the United States of America*, 108(34), pp.E559–68. Available at:  
712 [http://www.pubmedcentral.nih.gov/articlerender.fcgi?artid=3161548&tool=pmcentrez&renderty](http://www.pubmedcentral.nih.gov/articlerender.fcgi?artid=3161548&tool=pmcentrez&rendertype=abstract)  
713 [pe=abstract](http://www.pubmedcentral.nih.gov/articlerender.fcgi?artid=3161548&tool=pmcentrez&rendertype=abstract) [Accessed May 23, 2013].
- 714 Sevalle, J. et al., 2009. Aminopeptidase A contributes to the N-terminal truncation of amyloid beta-  
715 peptide. *Journal of neurochemistry*, 109(1), pp.248–56. Available at:  
716 <http://doi.wiley.com/10.1111/j.1471-4159.2009.05950.x> [Accessed October 8, 2019].
- 717 Shen, Z. et al., 2012. Kindlin-2: a novel adhesion protein related to tumor invasion, lymph node  
718 metastasis, and patient outcome in gastric cancer. *American journal of surgery*, 203(2), pp.222–  
719 9. Available at: <http://linkinghub.elsevier.com/retrieve/pii/S0002961011005964> [Accessed April  
720 27, 2018].
- 721 Smith, P.Y. et al., 2011. MicroRNA-132 loss is associated with tau exon 10 inclusion in progressive  
722 supranuclear palsy. *Human molecular genetics*, 20(20), pp.4016–24. Available at:  
723 <https://academic.oup.com/hmg/article-lookup/doi/10.1093/hmg/ddr330> [Accessed September 2,  
724 2019].
- 725 Soldano, A. & Hassan, B. a., 2014. Beyond pathology: APP, brain development and Alzheimer's  
726 disease. *Current Opinion in Neurobiology*, 27, pp.61–67. Available at:  
727 <http://dx.doi.org/10.1016/j.conb.2014.02.003>.
- 728 Sosa, L.J. et al., 2013. Amyloid precursor protein is an autonomous growth cone adhesion molecule  
729 engaged in contact guidance. *PloS one*, 8(5), p.e64521. Available at:  
730 [http://www.pubmedcentral.nih.gov/articlerender.fcgi?artid=3653867&tool=pmcentrez&renderty](http://www.pubmedcentral.nih.gov/articlerender.fcgi?artid=3653867&tool=pmcentrez&rendertype=abstract)  
731 [pe=abstract](http://www.pubmedcentral.nih.gov/articlerender.fcgi?artid=3653867&tool=pmcentrez&rendertype=abstract) [Accessed October 24, 2014].
- 732 Sossey-Alaoui, K. et al., 2019. The Kindlin2-p53-SerpineB2 signaling axis is required for cellular  
733 senescence in breast cancer. *Cell Death & Disease*, 10(8), p.539. Available at:  
734 <http://www.ncbi.nlm.nih.gov/pubmed/31308359> [Accessed January 10, 2020].
- 735 Stahl, R. et al., 2014. Shedding of APP limits its synaptogenic activity and cell adhesion properties.  
736 *Frontiers in cellular neuroscience*, 8, p.410. Available at:  
737 <http://www.ncbi.nlm.nih.gov/pubmed/25520622> [Accessed January 11, 2017].
- 738 Sullivan, S.E. et al., 2018. Candidate-based screening via gene modulation in human neurons and  
739 astrocytes implicates FERMT2 in A $\beta$  and TAU proteostasis. *Human Molecular Genetics*.

740 Available at: <https://academic.oup.com/hmg/advance-article/doi/10.1093/hmg/ddy376/5145655>  
741 [Accessed October 30, 2018].

742 Taylor, A.M. et al., 2010. Microfluidic local perfusion chambers for the visualization and  
743 manipulation of synapses. *Neuron*, 66(1), pp.57–68. Available at:  
744 <http://www.ncbi.nlm.nih.gov/pubmed/20399729> [Accessed October 12, 2016].

745 Theodosiou, M. et al., 2016. Kindlin-2 cooperates with talin to activate integrins and induces cell  
746 spreading by directly binding paxillin. *eLife*, 5. Available at:  
747 [http://www.pubmedcentral.nih.gov/articlerender.fcgi?artid=4749545&tool=pmcentrez&renderty](http://www.pubmedcentral.nih.gov/articlerender.fcgi?artid=4749545&tool=pmcentrez&rendertype=abstract)  
748 [pe=abstract](http://www.pubmedcentral.nih.gov/articlerender.fcgi?artid=4749545&tool=pmcentrez&rendertype=abstract) [Accessed February 4, 2016].

749 Weingarten, J. et al., 2017. APP-A Novel Player within the Presynaptic Active Zone Proteome.  
750 *Frontiers in molecular neuroscience*, 10, p.43. Available at:  
751 <http://www.ncbi.nlm.nih.gov/pubmed/28265241> [Accessed July 10, 2020].

752 Zhan, J. et al., 2012. Opposite Role of Kindlin-1 and Kindlin-2 in Lung Cancers. *PLoS ONE*, 7(11),  
753 pp.1–12.

754

755

756 **Table 1. Results of pathway enrichment analyses**

757 **a.** The 10 most likely canonical pathways identified after pathway enrichment analysis of 41 miRNAs  
758 that strongly modulate APP metabolism using DIANA Tools mirPath (v3.0)

| <b>KEGG pathway</b>                    | <b><i>p</i>-value</b> | <b>#miRNAs</b> |
|----------------------------------------|-----------------------|----------------|
| Axon guidance                          | 4.70E-08              | 48             |
| Proteoglycans in cancer                | 1.82E-06              | 49             |
| Hippo signaling pathway                | 4.10E-06              | 50             |
| Fatty acid biosynthesis                | 8.10E-05              | 11             |
| Glutamatergic synapse                  | 8.56E-05              | 48             |
| GABAergic synapse                      | 1.10E-04              | 48             |
| AMPK signaling pathway                 | 2.20E-04              | 46             |
| TGF-beta signaling pathway             | 2.50E-04              | 45             |
| Thyroid hormone signaling pathway      | 3.90E-04              | 48             |
| Adrenergic signaling in cardiomyocytes | 5.00E-04              | 49             |

759

760 **b.** The 10 most likely canonical pathways identified after pathway enrichment analysis of 132 genes  
761 targeted by 41 miRNAs (see Supplementary Methods for details)

| <b>KEGG pathway</b>            | <b><i>p</i>-value</b> | <b>#genes</b> |
|--------------------------------|-----------------------|---------------|
| Axon guidance                  | 0.0014                | 19            |
| Ubiquitin mediated proteolysis | 0.010                 | 16            |
| Circadian rhythm               | 0.036                 | 8             |

762

763

764

765



766 **Fig. 1. Validation of functional miRNAs targeting *FERMT2* 3'UTR**

767 **a.** Relative positions of miRNA target sites on *FERMT2* 3'UTR. The target site created by the  
768 rs7143400-T allele, which is associated with AD risk, is shown in red. **b.** Luciferase activity of  
769 *FERMT2* 3'UTR carrying either the rs7143400-G or the rs7143400-T allele in HEK-293 cells co-  
770 transfected with a non-targeting miRNA (miR-NT) or 5 miRNA mimics. Data are expressed relative  
771 to the miR-NT **c.** RFLP genotyping of HeLa and HEK293 cell lines edited or not for the rs7143400  
772 via CRISPR-Cas9 (**Supplementary Fig. 1**). **d.** Endogenous *FERMT2* expression levels were assessed  
773 by Western blot using indicated cell extracts following transient transfection with a non-targeting miR  
774 (miR-NT) or with the indicated miR for 72 h. **e.** WB quantifications from three independent  
775 experiments as in **d**. Data given in mean  $\pm$  SD. \*  $p < 0.05$ , non-parametric test compared to miR-NT  
776 condition.

777

778 **Fig 2. Validation of the effects of *FERMT2*-targeting miRNA on APP metabolism**

779 **a.** Mean fluorescence intensity of intracellular mCherry and YFP signals obtained after miRNA  
780 transfection in HEK293 cells stably over-expressing a mCherry-APP<sup>695WT</sup>-YFP. **b.** Quantification of  
781 A $\beta$  and sAPP $\alpha$  secretion after miRNAs transfection in HEK293 cells stably over-expressing a  
782 mCherry-APP<sup>695WT</sup>-YFP. **c.** Mean fluorescence intensity variation of intracellular mCherry and YFP  
783 signal obtained after miRNA transfection in HEK293<sup>rs7143400-G/G</sup> or HEK293<sup>rs7143400-G/T</sup> cell lines  
784 transiently over-expressing a mCherry-APP<sup>695WT</sup>-YFP. **d.** Quantification of A $\beta$  and sAPP $\alpha$  secretion  
785 after miRNAs transfection in HEK293<sup>rs7143400-G/G</sup> or HEK293<sup>rs7143400-G/T</sup> cell lines transiently over-  
786 expressing a mCherry-APP<sup>695WT</sup>-YFP. Bar charts show mean  $\pm$  SD. Mann-Whitney test; \*  $p < 0.05$ .

787

788 **Fig. 3. miRNA expression in primary neuronal cultures and in AD brains**

789 **a.** Hybridization experiments in rat postnatal hippocampal neuronal cultures enabling single-copy  
790 detection of miRNA combined with immunocytochemistry against astrocytic (SOX9) and neuronal  
791 (NeuN) markers. Scale bar = 20  $\mu$ m. The box plot shows the quantification of miRNA copy number in  
792 SOX9- or NeuN-positive cells (N > 30 cells for each condition). Black rectangles and red plus signs  
793 indicate sample mean and outliers, respectively. **b.** Relative miRNA expression levels in temporal  
794 lobes of non-demented (CTL) and AD groups. Mann-Whitney test; \*\*\*\*  $p < 0.0001$ .

795

796 **Fig 4. *FERMT2* directly interacts with APP**

797 **a.** Immunofluorescence images showing the presence of APP and *FERMT2* within the axonal growth  
798 cone stained with SiR-Actin. The right panel shows the presence of PLA-*FERMT2*/APP puncta within  
799 the axonal growth cone. **b.** Impact of lentiviral transduction of non-targeting shRNA (shNT) or  
800 shRNA against *FERMT2* (sh*FERMT2*) on growth cone area, angular dispersion and speed of the actin

801 retrograde flow, and APP immunostaining. **c.** Co-IP between endogenous APP and FERMT2 from  
802 membrane extracts of hippocampal PNC. Protein extracts were incubated with beads only, a mouse  
803 (Ms) antibody against APP (4G8) or a non-relevant (NR) antibody. **d.** APP pull-down experiment with  
804 wild type (WT) or mutated (QW) FERMT2. Protein extracts from HeLa cells overexpressing  
805 FERMT2<sup>WT</sup> or FERMT2<sup>QW</sup> were incubated with recombinant APP C-terminal fragment (C100). **e.** The  
806 domain organization of FERMT2 protein (upper panel). Q614A/W615A (QW) mutation was reported  
807 to abolish the interaction of F3 domain of FERMT2 with the NxTY motif. The structural model of the  
808 FERMT2-APP complex (lower panel) was built by homology using the crystal structure of the  
809 FERMT2-Integrin-β3-tail complex (Li et al. 2017). **f.** The impact of FERMT2 on APP metabolism in  
810 HEK293-APP<sup>695WT</sup> cells is reverted with the overexpression of FERMT2<sup>QW</sup> compared to FERMT2<sup>WT</sup>.  
811 Scale bar = 5 μm. Mann–Whitney test; \*  $p < 0.05$ .

812

### 813 **Fig 5. FERMT2 regulates axonal growth rate depending on APP expression**

814 Impact of lentiviral transduction on axonal growth speed. Individual axon tracks from a representative  
815 set are plotted. Scale bars = 50 μm. Box plots and cumulative distribution plots are color-matched. *n* is  
816 the number of axons analyzed from at least three independent experiments. Kruskal-Wallis ANOVA  
817 with multiple comparisons; \*  $p < 5 \times 10^{-3}$ ; \*\*\*  $p < 5 \times 10^{-7}$ .

818

### 819 **Fig 6. FERMT2 is present at the synapse and controls synaptic connectivity**

820 **a.** Immunofluorescence in hippocampal primary neuronal culture showing the co-localization of  
821 FERMT2 puncta with pre- and postsynaptic markers, Synaptophysin and Homer, respectively. **b.**  
822 Synaptic fractionation experiment revealed the presence of FERMT2 in both pre- and postsynaptic  
823 compartments. **c.** Schematics of the tricompartamental microfluidic device. The use of microchannels  
824 with different lengths ensures that only axons arrive from the presynaptic to the synaptic compartment,  
825 where synapses can be observed independently of the cell bodies. The device also permits lentiviral  
826 transductions to be performed exclusively in the pre- and postsynaptic compartments. **d.** Synaptic  
827 connectivity as a function of FERMT2 under-expression in pre- and postsynaptic chambers. Increased  
828 fraction of Synaptophysin spots not assigned by a Homer spot within a distance threshold of 1 μm is  
829 indicative of decreased synaptic connectivity. **e.** PLA-FERMT2/APP puncta were observed at the  
830 synapses stained for pre- and postsynaptic markers. Scale bars = 2 μm.

831

### 832 **Fig 7. FERMT2 under-expression alters PPF and LTP in an APP-dependent manner**

833 **a.** Paired-pulse facilitation (PPF) as a function of the interstimulus interval 7 days after viral injection  
834 of indicated lentivirus. *N* = 3 mice; 2 slices per animal. **b.** Exemplary fEPSP traces during baseline  
835 (light line) and 30-60 min after LTP induction (dark line). **c.** Time course of the average slope of  
836 elicited fEPSP responses following LTP induction by a tetanic stimulation protocol in hippocampal  
837 CA1 synapses after viral injection. Time-point 0 represents the delivery of the tetanic stimulation.

838 Slopes of each fEPSP are normalized by the baseline and plotted against time. **d.** Box plots of the  
839 average slope response during 30-60 min post LTP induction. HFS: High frequency stimulation. N = 5  
840 mice; 2 slices per animal. **e.** Normalized average slope of fEPSP evoked in hippocampal slices from  
841 animals injected with the indicated lentivirus. Recordings have been performed in the stratum  
842 radiatum of hippocampal CA1 region with electrical stimulation of Schaffer collaterals (see Methods).  
843 Unpaired t-test; \*  $p < 0.05$ ; \*\*  $p < 0.01$ .  
844

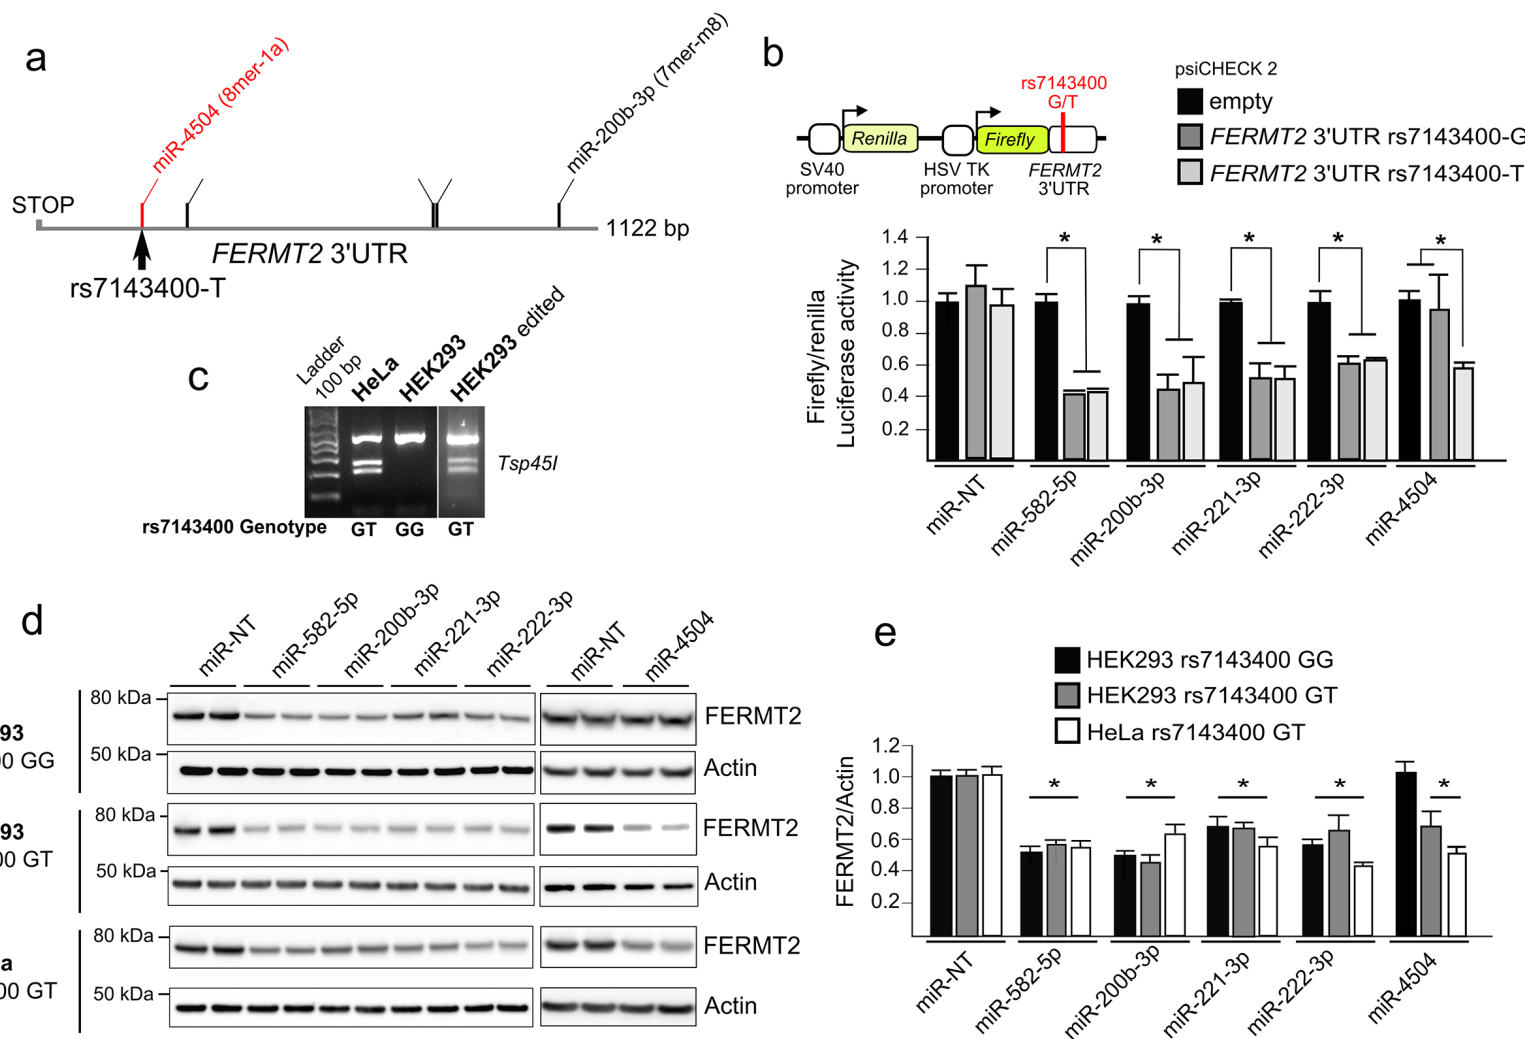

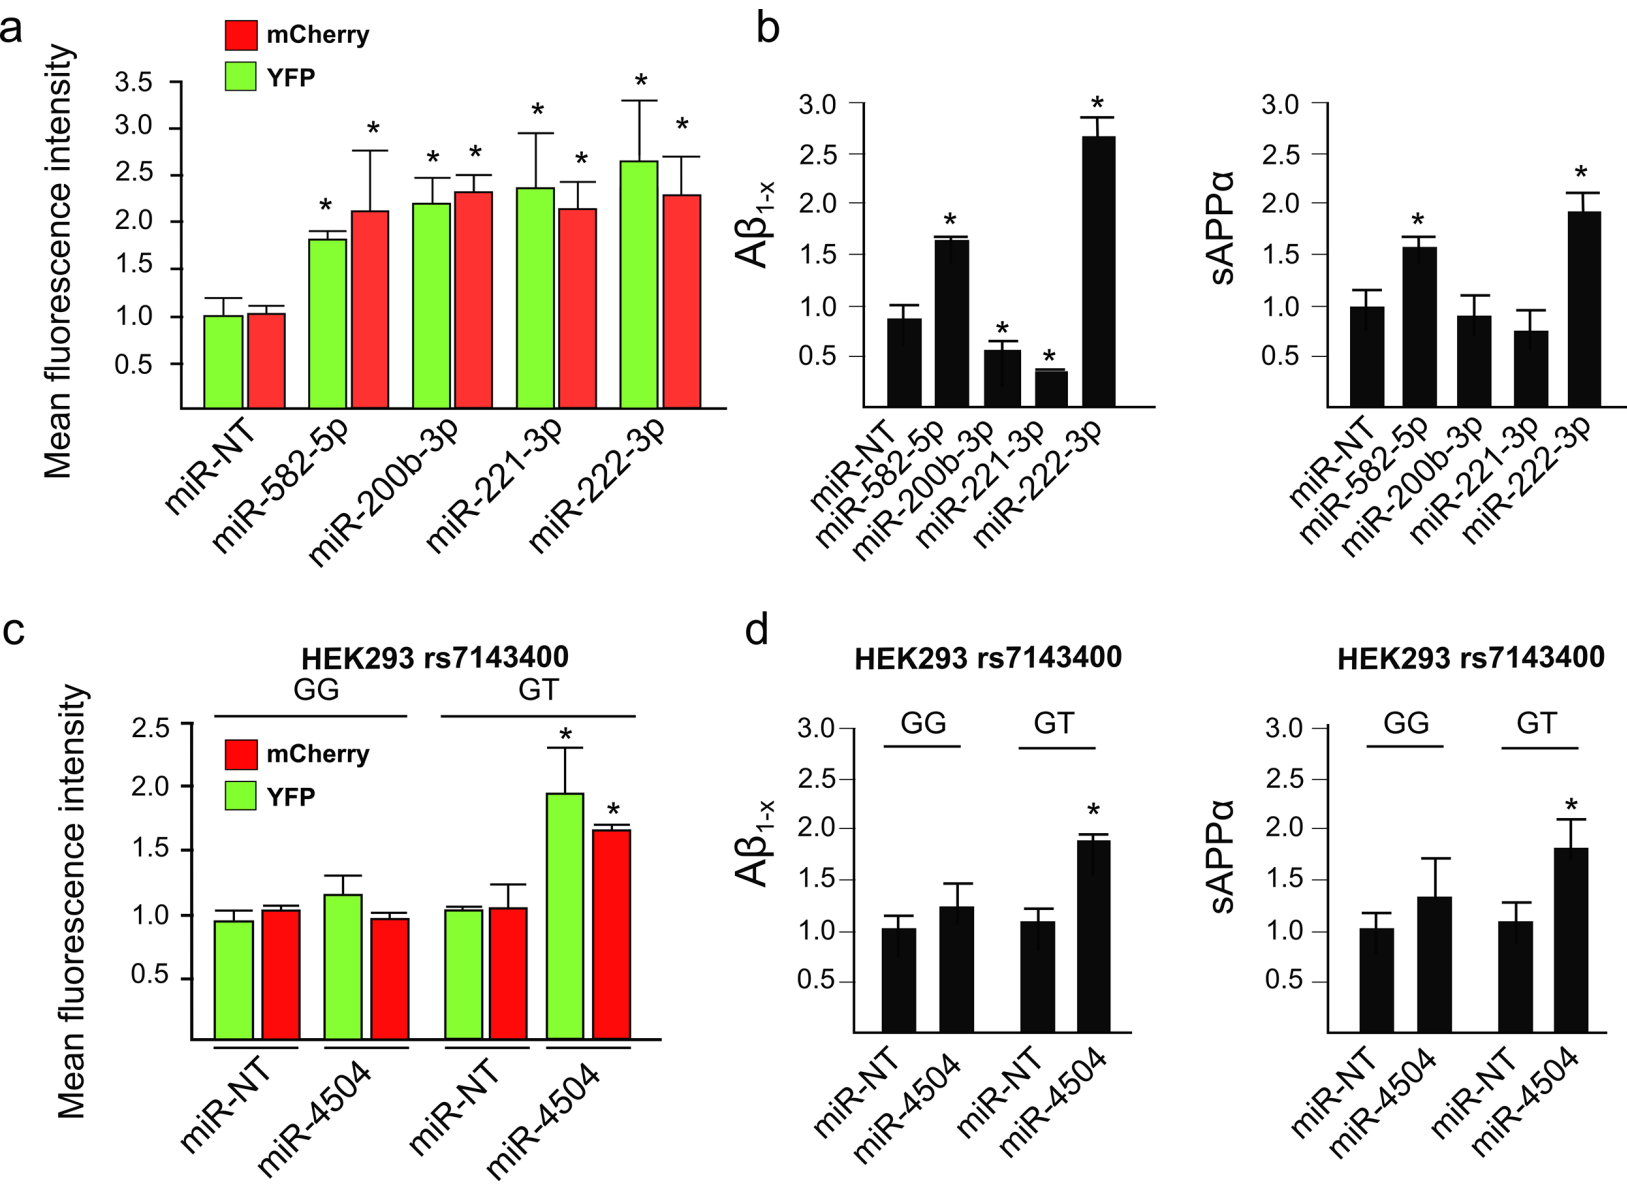

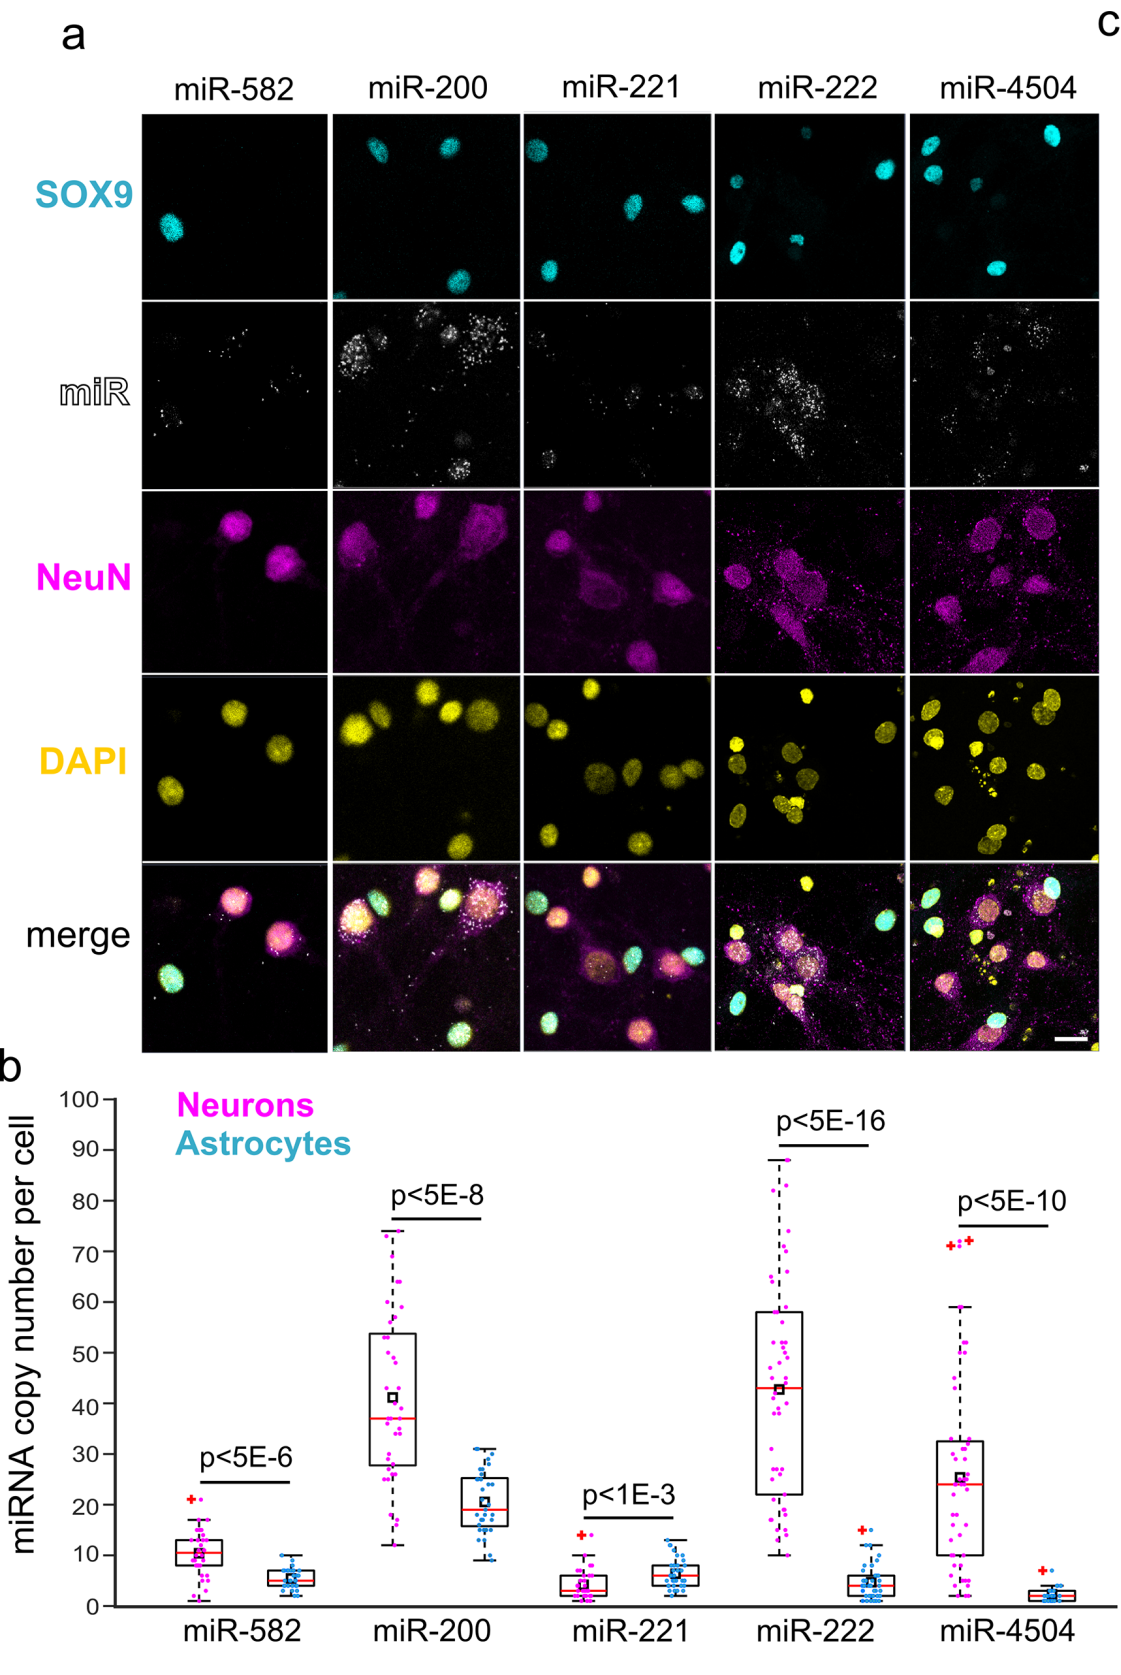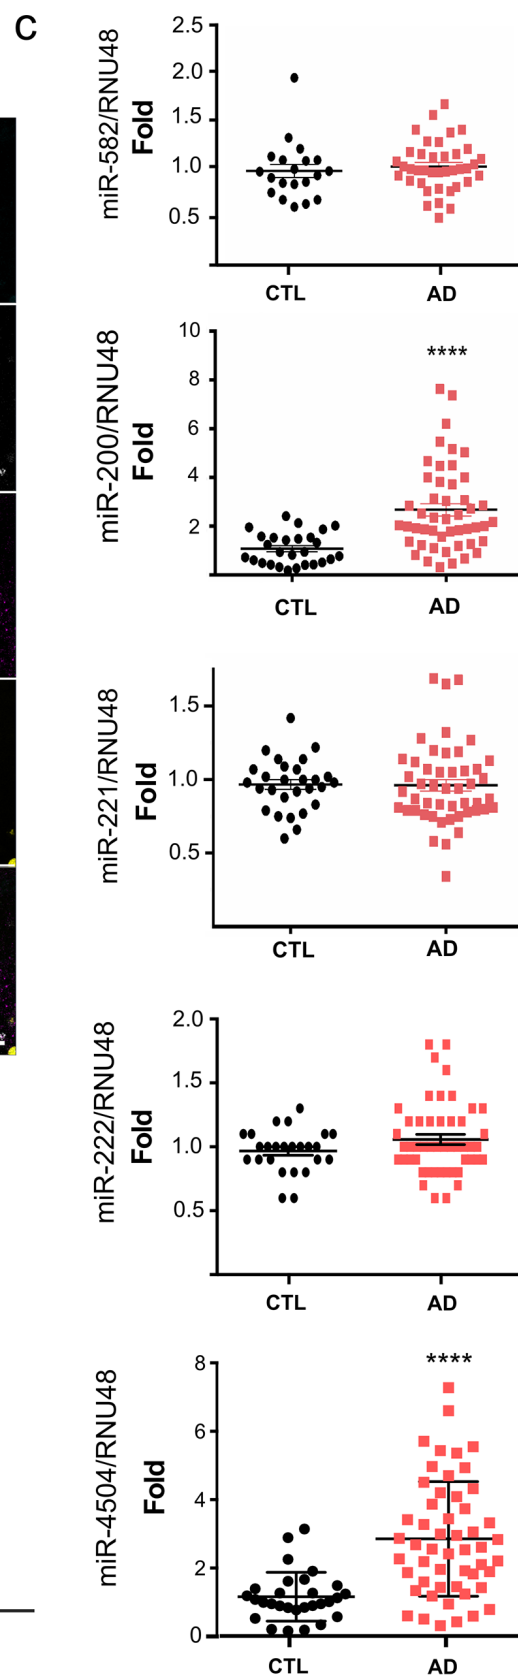

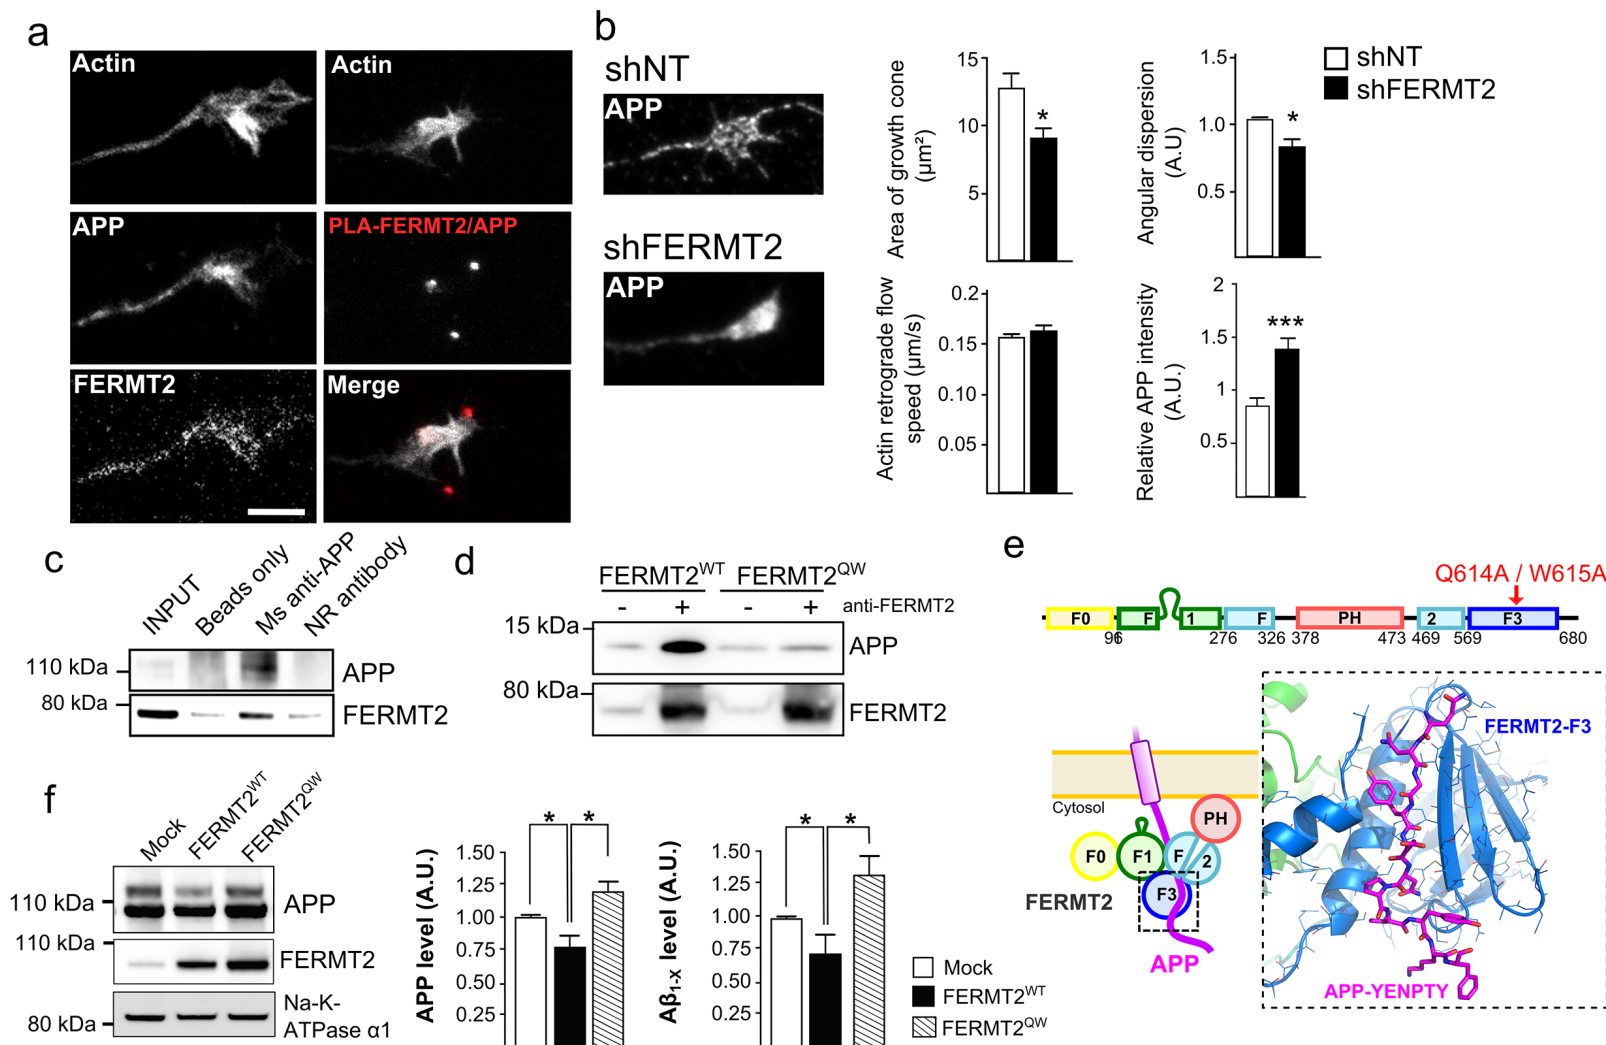

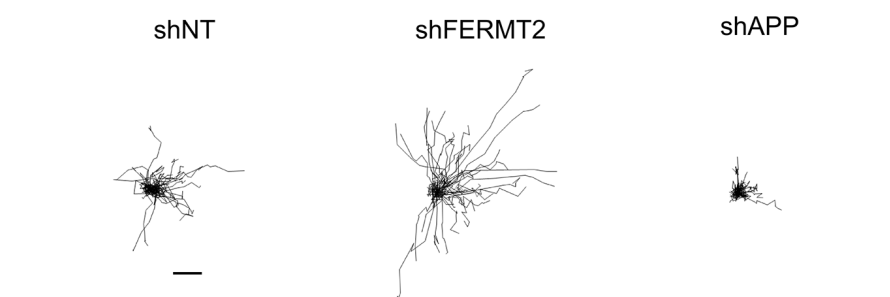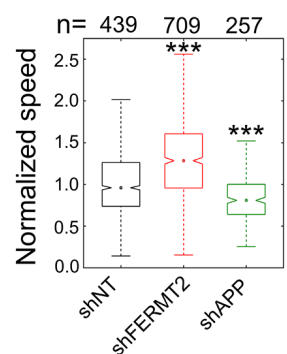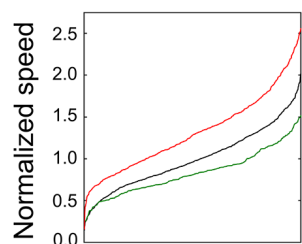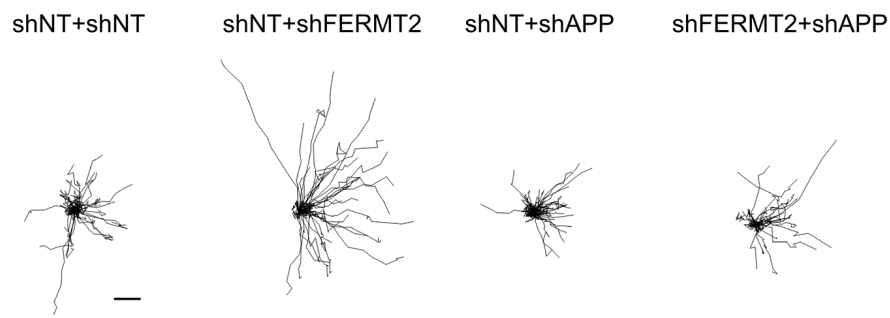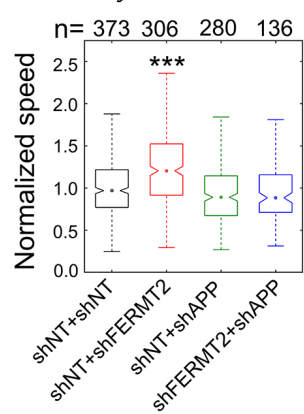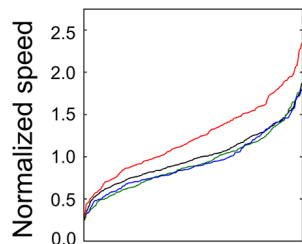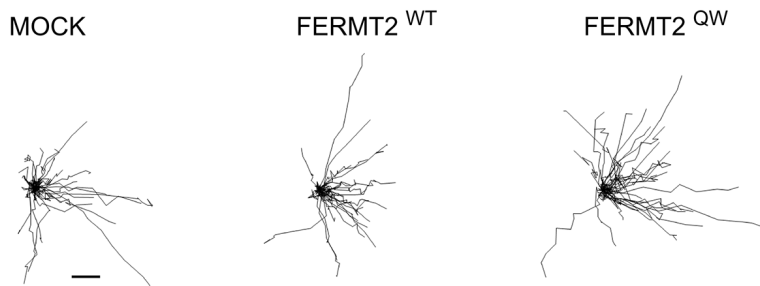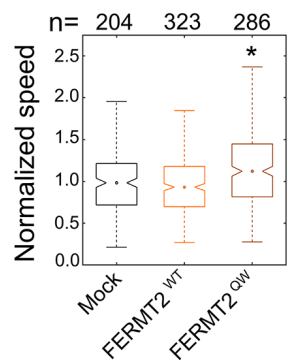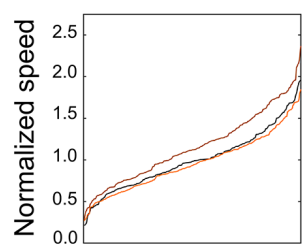



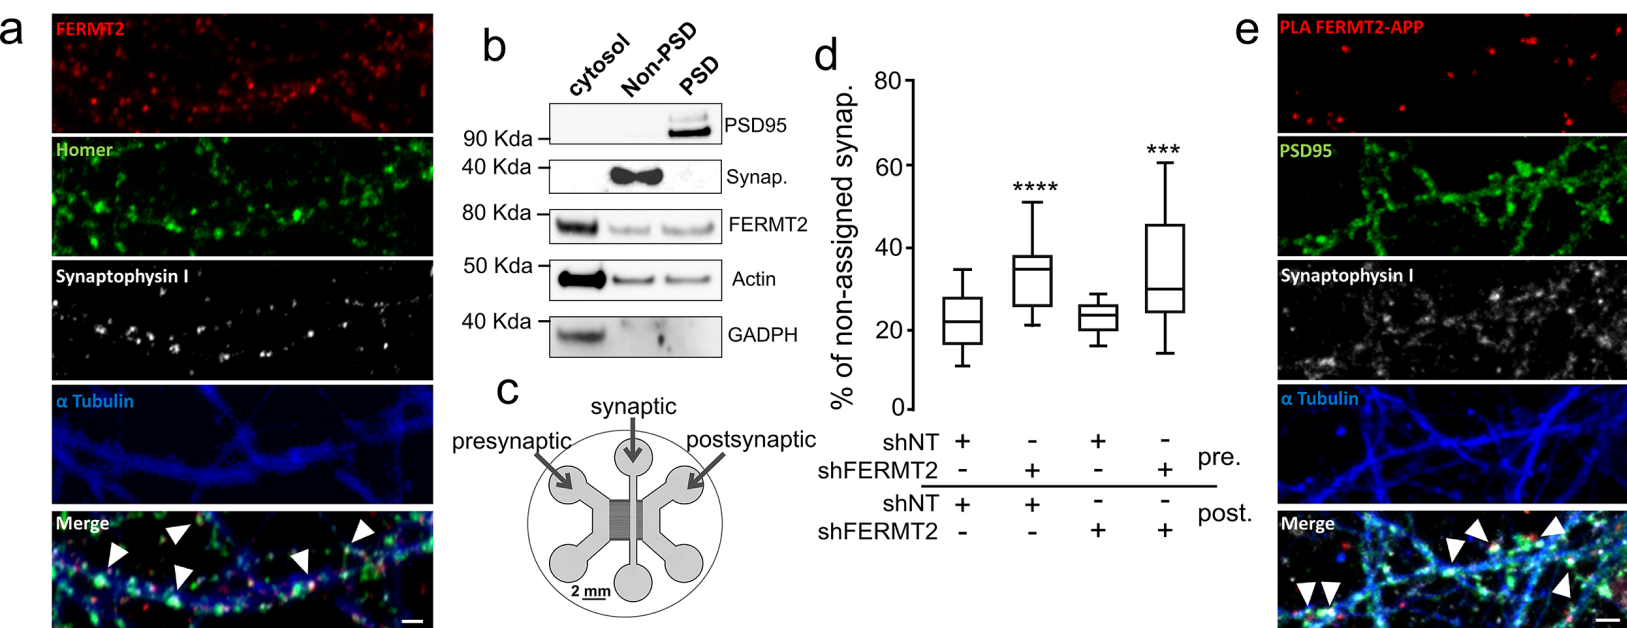

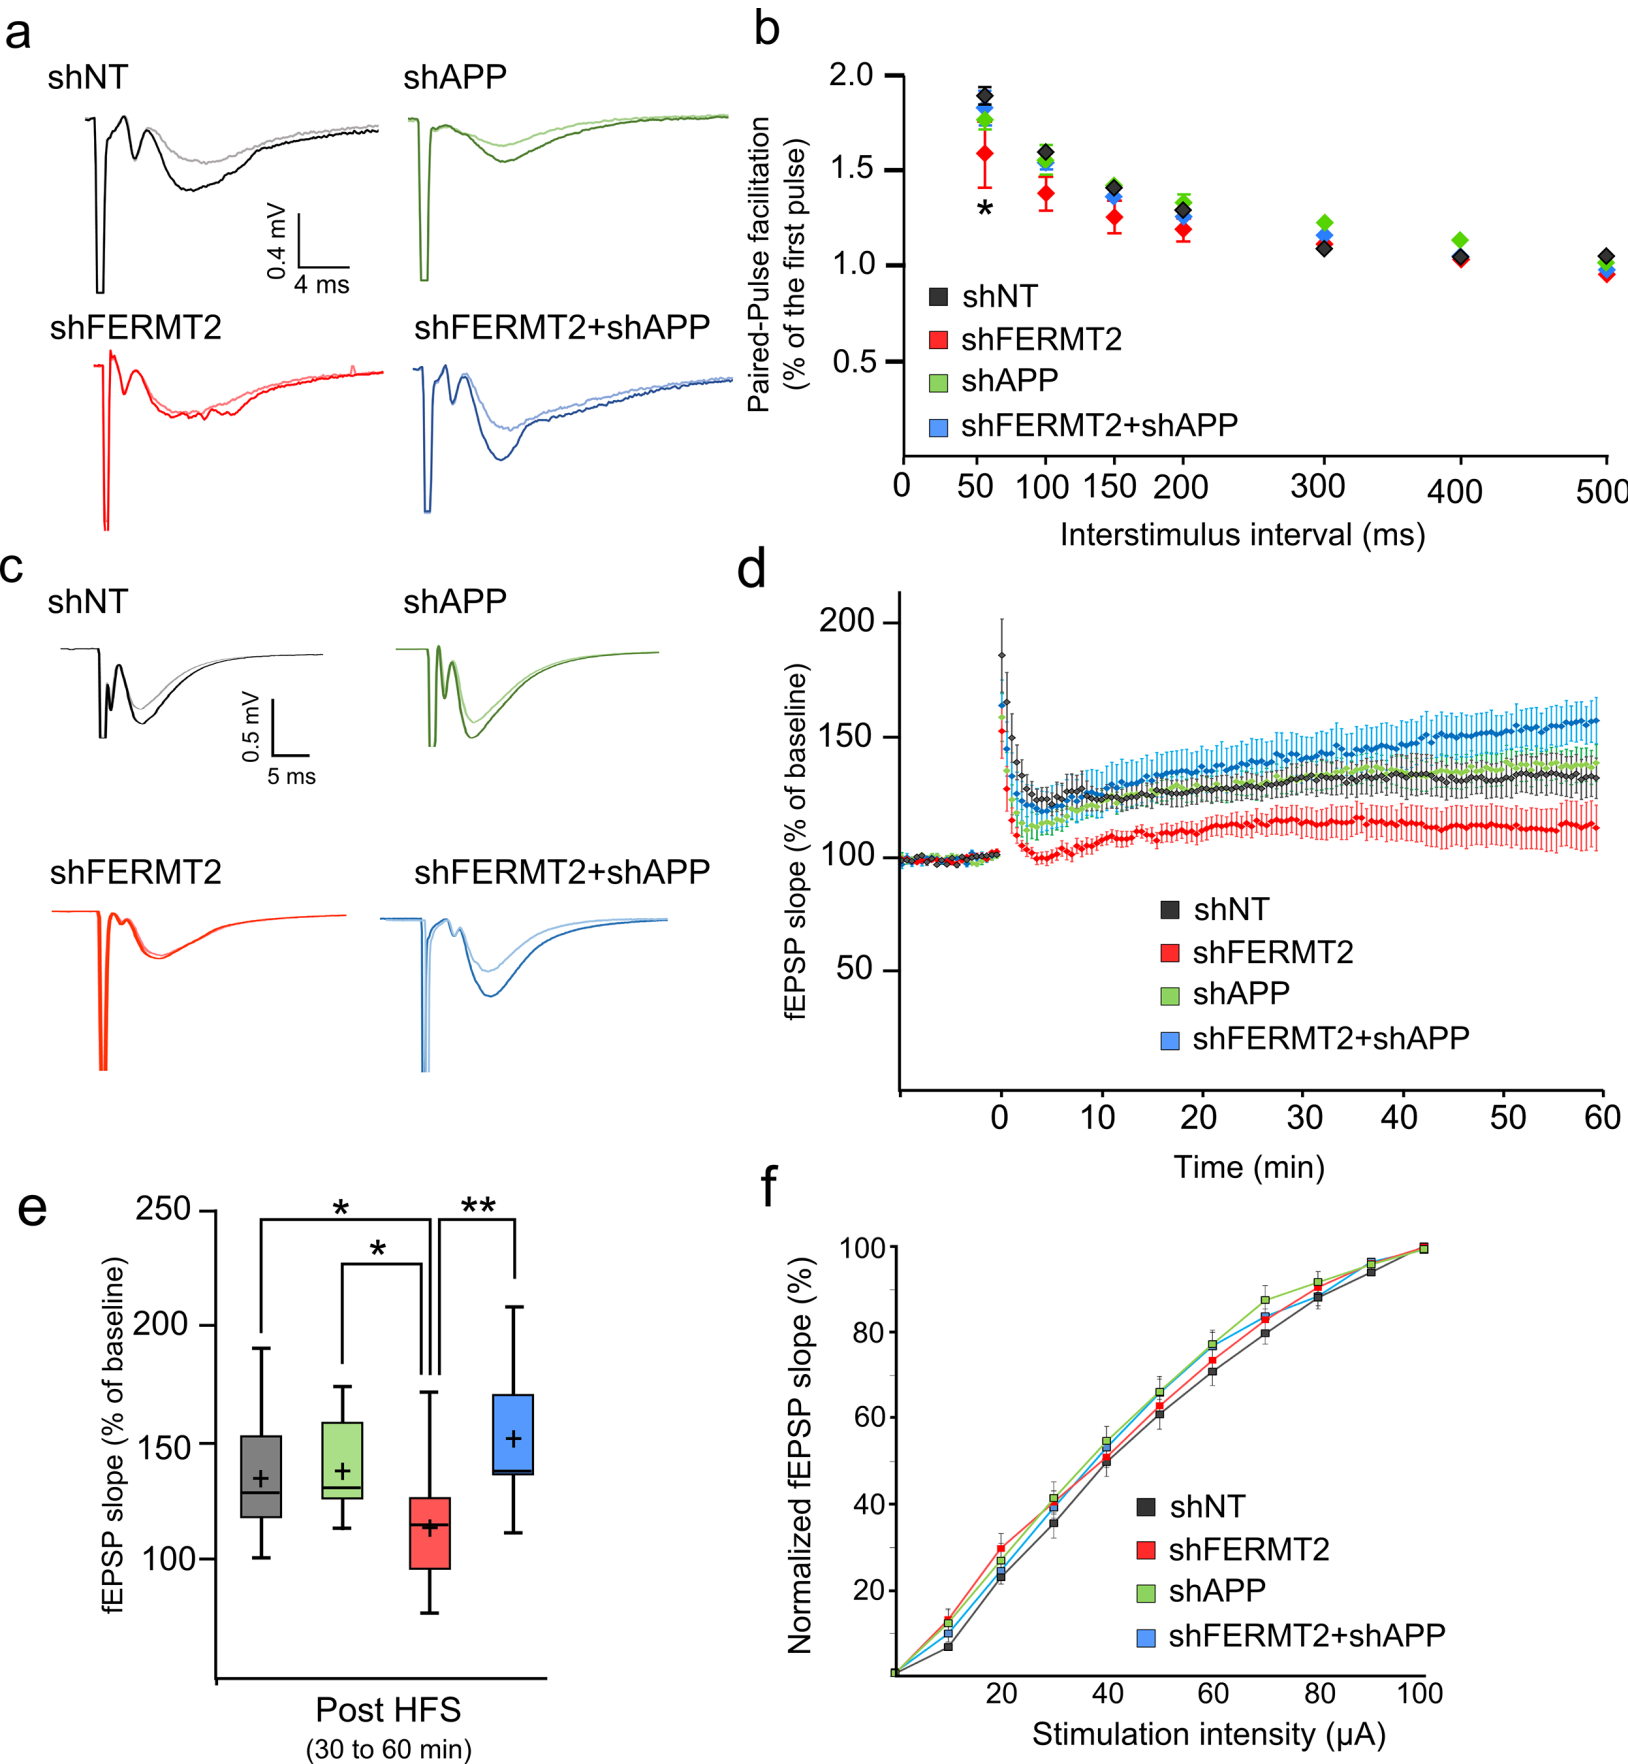

Source: https://www.biorxiv.org/content/biorxiv/early/2020/07/17/767194.full.pdf
